# Supplementary material for: Multiple mechanisms of MYCN dysregulation in Wilms tumour
Source: PubMed Central journal article supplement (PMC4466681; doi:10.18632/oncotarget.3377), 2015-01-31

## Supplementary Table 1

| Sample (ICH) ID | Anon Case ID | Exome data | MYCN codon 44 covered in exome | MYCN Sanger sequencing data           | MYCN Variant detected | Germline variant | MLPA data | Relapse free survival (months) | Relapse (1 = relapse; 0 = no relapse) | Overall survival (months) | Death (1 = dead; 0 = alive) | Reviewed histology (AH = anaplastic) | MYCN status | DYSF status |
|-----------------|--------------|------------|--------------------------------|---------------------------------------|-----------------------|------------------|-----------|--------------------------------|---------------------------------------|---------------------------|-----------------------------|--------------------------------------|-------------|-------------|
| 201             | 2            | y          | y                              |                                       |                       |                  | y         | 139                            | 0                                     | 139                       | 0                           | Mixed                                | normal      | normal      |
| 205             | 4            | y          | y                              |                                       |                       |                  | y         | 4                              | 1                                     | 123                       | 0                           | Mixed                                | GAIN        | normal      |
| 213             | 21           |            |                                | y (all coding exons)                  |                       |                  | y         | 128                            | 0                                     | 128                       | 0                           | Stromal                              | normal      | normal      |
| 302             | 16           | y          | y                              |                                       |                       |                  | y         | 2                              | 1                                     | 7                         | 1                           | Blastemal                            | normal      | normal      |
| 325             | 29           | y          | y                              |                                       |                       |                  | y         | 8                              | 1                                     | 113                       | 0                           | Regressive                           | normal      | normal      |
| 765             | 35           |            |                                | y (all coding exons)                  |                       |                  | y         | 117                            | 0                                     | 117                       | 0                           | Mixed                                | GAIN        | GAIN        |
| 1154            | 332          |            |                                |                                       |                       |                  | y         | 117                            | 0                                     | 117                       | 0                           | Mixed                                | normal      | normal      |
| 1159            | 44           |            |                                | y (all coding exons)                  |                       |                  | y         | 113                            | 0                                     | 113                       | 0                           | Stromal                              | normal      | normal      |
| 1493            | 51           | y          | y                              |                                       |                       |                  | y         | 105                            | 0                                     | 105                       | 0                           | Mixed                                | normal      | normal      |
| 1619            | 33           |            |                                | y (all coding exons)                  |                       |                  | y         | 72                             | 0                                     | 72                        | 0                           | Stromal                              | normal      | normal      |
| 1622            | 7            |            |                                | y (all coding exons)                  |                       |                  | y         | 122                            | 0                                     | 122                       | 0                           | Blastemal                            | normal      | normal      |
| 1706            | 334          |            |                                |                                       |                       |                  | y         | 103                            | 0                                     | 103                       | 0                           | Diffuse AH                           | GAIN        | normal      |
| 1752            | 11           |            |                                | y (all coding exons)                  |                       |                  |           | 113                            | 0                                     | 113                       | 0                           | Mixed                                |             |             |
| 1761            | 17           |            |                                | y (all coding exons)                  |                       |                  |           | 121                            | 0                                     | 121                       | 0                           | Regressive                           |             |             |
| 1765            | 12           |            |                                | y (all coding exons)                  |                       |                  | y         | 69                             | 1                                     | 121                       | 0                           | Stromal                              | normal      | normal      |
| 1769            | 14           |            |                                | y (all coding exons)                  |                       |                  | y         | 128                            | 0                                     | 128                       | 0                           | Stromal                              | GAIN        | GAIN        |
| 1770            | 13           | y          | y                              |                                       |                       |                  | y         | 121                            | 0                                     | 121                       | 0                           | Epithelial                           | normal      | normal      |
| 1775            | 24           |            |                                | y (all coding exons)                  |                       |                  | y         | 107                            | 0                                     | 107                       | 0                           | Regressive                           | normal      | normal      |
| 1779            | 45           | y          | y                              |                                       |                       |                  | y         | 100                            | 0                                     | 100                       | 0                           | Focal AH                             | normal      | normal      |
| 1783            | 28           |            |                                | y (all coding exons)                  |                       |                  | y         | 105                            | 0                                     | 105                       | 0                           | Regressive                           | normal      | normal      |
| 1784            | 34           |            |                                | y (all coding exons)                  |                       |                  | y         | 59                             | 0                                     | 59                        | 0                           | Epithelial                           | normal      | normal      |
| 1785            | 22           |            |                                | y (all coding exons)                  |                       |                  | y         | 106                            | 0                                     | 106                       | 0                           | Mixed                                | normal      | normal      |
| 2219            | 68           |            |                                | y (all coding exons)                  |                       |                  | y         | 11                             | 1                                     | 31                        | 1                           | Mixed                                | normal      | normal      |
| 2220            | 65           |            |                                | y (all coding exons)                  |                       |                  | y         | 94                             | 0                                     | 94                        | 0                           | Diffuse AH                           | normal      | normal      |
| 2261            | 23           |            |                                | y (all coding exons)                  |                       |                  | y         | 8                              | 1                                     | 114                       | 0                           | Regressive                           | normal      | normal      |
| 2377            | 26           |            |                                | y (all coding exons)                  |                       |                  | y         | 125                            | 0                                     | 125                       | 0                           | Regressive                           | normal      | normal      |
| 2379            | 20           |            |                                | y (all coding exons)                  |                       |                  |           | 118                            | 0                                     | 118                       | 0                           | Regressive                           |             |             |
| 2382            | 5            |            |                                | y (all coding exons)                  |                       |                  | y         | 125                            | 0                                     | 125                       | 0                           | Mixed                                | normal      | normal      |
| 2408            | 77           | y          | y                              |                                       |                       |                  | y         | 4                              | 1                                     | 7                         | 1                           | Stromal                              | GAIN        | normal      |
| 2409            | 76           |            |                                | y (all coding exons)                  |                       |                  | y         | 94                             | 0                                     | 94                        | 0                           | Stromal                              | normal      | normal      |
| 2557            | 83           |            |                                | y (all coding exons)                  |                       |                  | y         | 9                              | 1                                     | 11                        | 1                           | Diffuse AH                           | normal      | normal      |
| 2558            | 75           |            |                                | y (all coding exons)                  |                       |                  | y         | 81                             | 0                                     | 81                        | 0                           | Stromal                              | normal      | normal      |
| 2560            | 86           | y          | y                              | y (to confirm variant found in exome) | P44L                  | n                | y         | 98                             | 0                                     | 98                        | 0                           | Focal AH                             | normal      | normal      |
| 2594            | 333          |            |                                |                                       |                       |                  | y         | 10                             | 1                                     | 94                        | 0                           | Epithelial                           | normal      | normal      |
| 2649            | 341          |            |                                |                                       |                       |                  | y         | 120                            | 0                                     | 120                       | 0                           | Mixed                                | normal      | normal      |
| 2652            | 31           |            |                                | y (all coding exons)                  |                       |                  | y         | 111                            | 0                                     | 111                       | 0                           | Mixed                                | normal      | normal      |
| 2655            | 48           |            |                                | y (all coding exons)                  |                       |                  |           | 105                            | 0                                     | 105                       | 0                           | Regressive                           |             |             |
| 2663            | 3            |            |                                | y (all coding exons)                  |                       |                  | y         | 116                            | 0                                     | 116                       | 0                           | Stromal                              | normal      | normal      |
| 2664            | 344          |            |                                |                                       |                       |                  | y         | 106                            | 0                                     | 106                       | 0                           | Mixed                                | normal      | normal      |
| 2665            | 30           |            |                                | y (all coding exons)                  |                       |                  | y         | 9                              | 1                                     | 96                        | 0                           | Epithelial                           | normal      | normal      |
| 2670            | 52           |            |                                | y (all coding exons)                  |                       |                  |           | 91                             | 0                                     | 91                        | 0                           | Stromal                              |             |             |
| 2714            | 37           | y          | y                              |                                       |                       |                  | y         | 121                            | 0                                     | 121                       | 0                           | Mixed                                | normal      | normal      |
| 2716            | 10           |            |                                | y (all coding exons)                  |                       |                  | y         | 26                             | 1                                     | 42                        | 1                           | Blastemal                            | normal      | normal      |
| 2717            | 59           | y          | y                              |                                       |                       |                  | y         | 90                             | 0                                     | 90                        | 0                           | Blastemal                            | normal      | normal      |
| 2720            | 55           | y          | y                              |                                       |                       |                  | y         | 101                            | 0                                     | 101                       | 0                           | Blastemal                            | normal      | normal      |
| 2732            | 95           |            |                                | y (all coding exons)                  |                       |                  | y         | 87                             | 0                                     | 87                        | 0                           | Regressive                           | GAIN        | normal      |
| 2733            | 93           |            |                                | y (all coding exons)                  |                       |                  | y         | 96                             | 0                                     | 96                        | 0                           | Mixed                                | normal      | normal      |
| 2734            | 91           |            |                                | y (all coding exons)                  |                       |                  |           | 95                             | 0                                     | 95                        | 0                           | Regressive                           |             |             |
| 2964            | 74           |            |                                | y (all coding exons)                  |                       |                  | y         | 12                             | 0                                     | 12                        | 0                           | Mixed                                | normal      | normal      |
| 2967            | 78           |            |                                | y (all coding exons)                  |                       |                  |           | 5                              | 1                                     | 6                         | 1                           | Diffuse AH                           |             |             |
| 2969            | 89           | y          | y                              |                                       |                       |                  | y         | 9                              | 1                                     | 12                        | 1                           | Diffuse AH                           | GAIN        | normal      |
| 2970            | 338          |            |                                |                                       |                       |                  | y         | 96                             | 0                                     | 96                        | 0                           | Regressive                           | normal      | normal      |
| 2987            | 82           |            |                                | y (all coding exons)                  |                       |                  | y         | 96                             | 0                                     | 96                        | 0                           | Regressive                           | normal      | normal      |
| 2990            | 98           | y          | y                              |                                       |                       |                  | y         | 61                             | 1                                     | 87                        | 0                           | Epithelial                           | normal      | normal      |
| 2994            | 96           |            |                                | y (all coding exons)                  |                       |                  | y         | 88                             | 0                                     | 88                        | 0                           | Regressive                           | normal      | normal      |
| 3010            | 66           |            |                                | y (all coding exons)                  |                       |                  | y         | 104                            | 0                                     | 104                       | 0                           | Stromal                              | normal      | normal      |
| 3020            | 79           |            |                                | y (all coding exons)                  |                       |                  | y         | 5                              | 1                                     | 7                         | 1                           | Blastemal                            | GAIN        | normal      |
| 3133            | 8            |            |                                | y (all coding exons)                  |                       |                  | y         | 66                             | 0                                     | 66                        | 0                           | Diffuse AH                           | normal      | normal      |
| 3136            | 15           |            |                                | y (all coding exons)                  | R285W                 | y                | y         | 102                            | 0                                     | 102                       | 0                           | Stromal                              | normal      | normal      |
| 3140            | 25           | y          | y                              |                                       |                       |                  | y         | 97                             | 0                                     | 97                        | 0                           | Stromal                              | normal      | normal      |
| 3141            | 36           | y          | y                              |                                       |                       |                  | y         | 111                            | 0                                     | 111                       | 0                           | Stromal                              | normal      | normal      |
| 3142            | 39           | y          | y                              |                                       |                       |                  | y         | 113                            | 0                                     | 113                       | 0                           | Stromal                              | normal      | normal      |
| 3143            | 40           | y          | n                              |                                       |                       |                  | y         | 105                            | 0                                     | 105                       | 0                           | Diffuse AH                           | GAIN        | GAIN        |
| 3144            | 41           |            |                                | y (all coding exons)                  |                       |                  | y         | 108                            | 0                                     | 108                       | 0                           | Diffuse AH                           | normal      | normal      |

|      |     |   |   |                                              |      |     |   |     |   |     |   |            |        |        |
|------|-----|---|---|----------------------------------------------|------|-----|---|-----|---|-----|---|------------|--------|--------|
| 3145 | 43  | y | y |                                              |      |     | y | 18  | 1 | 19  | 1 | Diffuse AH | normal | normal |
| 3146 | 47  |   |   | y (all coding exons)                         |      |     | y | 86  | 0 | 86  | 0 | Regressive | normal | normal |
| 3147 | 54  | y | y |                                              |      |     | y | 97  | 0 | 97  | 0 | Epithelial | normal | normal |
| 3148 | 72  | y | y |                                              |      |     | y | 38  | 1 | 93  | 0 | Mixed      | normal | normal |
| 3150 | 340 |   |   |                                              |      |     | y | 78  | 0 | 78  | 0 | Regressive | normal | normal |
| 3152 | 97  |   |   | y (all coding exons)                         |      |     |   | 71  | 0 | 71  | 0 | Stromal    |        |        |
| 3156 | 19  |   |   | y (all coding exons)                         |      |     | y | 94  | 0 | 94  | 0 | Regressive | normal | normal |
| 3160 | 38  |   |   | y (all coding exons)                         |      |     | y | 73  | 0 | 73  | 0 | Stromal    | normal | normal |
| 3162 | 90  |   |   | y (all coding exons)                         |      |     | y | 11  | 1 | 57  | 0 | Stromal    | normal | normal |
| 3166 | 94  | y | y |                                              |      |     |   | 65  | 0 | 65  | 0 | Stromal    |        |        |
| 3201 | 336 |   |   |                                              |      |     | y | 99  | 0 | 99  | 0 | Regressive | normal | normal |
| 3477 | 108 | y | y |                                              |      |     | y | 84  | 0 | 84  | 0 | Diffuse AH | GAIN   | normal |
| 3738 | 70  |   |   | y (all coding exons)                         |      |     | y | 70  | 0 | 70  | 0 | Regressive | normal | normal |
| 3745 | 335 |   |   |                                              |      |     | y | 97  | 0 | 97  | 0 | Stromal    | normal | normal |
| 3747 | 46  | y | y |                                              |      |     |   | 108 | 0 | 108 | 0 | Mixed      |        |        |
| 3750 | 6   |   |   | y (NB: 2nd coding exon incompletely covered) |      |     | y | 129 | 0 | 129 | 0 | Mixed      | normal | normal |
| 3751 | 339 |   |   |                                              |      |     | y | 87  | 0 | 87  | 0 | Mixed      | normal | normal |
| 3863 | 107 | y | y | y (to confirm variant found in exome)        | P44L | n   |   | 52  | 1 | 88  | 0 | Regressive |        |        |
| 3871 | 100 | y | y |                                              |      |     | y | 90  | 0 | 90  | 0 | Focal AH   | normal | normal |
| 3886 | 102 |   |   | y (all coding exons)                         |      |     | y | 11  | 1 | 20  | 1 | Epithelial | normal | normal |
| 4081 | 27  |   |   |                                              |      |     | y | 22  | 1 | 125 | 0 | Mixed      | normal | normal |
| 4083 | 27  | y | y |                                              |      |     |   | 22  | 1 | 125 | 0 | Mixed      |        |        |
| 4092 | 67  | y | y |                                              |      |     | y | 74  | 1 | 101 | 0 | Regressive | normal | normal |
| 4212 | 117 |   |   | y (all coding exons)                         |      |     |   | 66  | 0 | 66  | 0 | Regressive |        |        |
| 4624 | 124 |   |   | y (all coding exons)                         |      |     | y | 69  | 0 | 69  | 0 | Stromal    | normal | normal |
| 4632 | 126 | y | y |                                              |      |     |   | 40  | 0 | 40  | 0 | Stromal    |        |        |
| 4644 | 71  |   |   | y (all coding exons)                         |      |     | y |     |   | 3   | 1 | Mixed      | GAIN   | normal |
| 4646 | 85  |   |   | y (all coding exons)                         |      |     | y | 98  | 0 | 98  | 0 | Stromal    | normal | normal |
| 4648 | 88  |   |   | y (all coding exons)                         |      |     | y | 93  | 0 | 93  | 0 | Regressive | normal | normal |
| 4667 | 92  |   |   | y (all coding exons)                         |      |     | y | 6   | 1 | 87  | 0 | Diffuse AH | normal | normal |
| 4671 | 112 | y | y |                                              |      |     | y | 73  | 0 | 73  | 0 | Focal AH   | normal | normal |
| 4674 | 115 | y | y |                                              |      |     | y | 75  | 0 | 75  | 0 | Blastemal  | normal | normal |
| 4681 | 128 |   |   | y (all coding exons)                         |      |     | y | 61  | 0 | 61  | 0 | Mixed      | GAIN   | GAIN   |
| 4686 | 53  |   |   | y (all coding exons)                         |      |     | y | 105 | 0 | 105 | 0 | Epithelial | normal | normal |
| 4692 | 113 |   |   | y (all coding exons)                         | S76N | N/A |   | 74  | 0 | 74  | 0 | Regressive |        |        |
| 4706 | 106 | y | y |                                              |      |     |   | 38  | 1 | 80  | 0 | Regressive |        |        |
| 4709 | 110 | y | n |                                              |      |     | y | 85  | 0 | 85  | 0 | Epithelial | normal | normal |
| 4714 | 337 |   |   |                                              |      |     | y | 92  | 0 | 92  | 0 | Stromal    | normal | normal |
| 4718 | 121 | y | y |                                              |      |     | y | 11  | 1 | 27  | 1 | Diffuse AH | GAIN   | normal |
| 4721 | 60  | y | y |                                              |      |     |   | 9   | 1 | 105 | 0 | Mixed      |        |        |
| 4722 | 60  |   |   |                                              |      |     | y | 9   | 1 | 105 | 0 | Mixed      | normal | normal |
| 4733 | 104 |   |   | y (all coding exons)                         |      |     | y | 70  | 0 | 70  | 0 | Mixed      | normal | normal |
| 4735 | 114 | y | y |                                              |      |     | y | 10  | 1 | 53  | 0 | Epithelial | normal | normal |
| 4737 | 116 |   |   | y (all coding exons)                         |      |     | y | 54  | 0 | 54  | 0 | Regressive | normal | normal |
| 4759 | 343 |   |   |                                              |      |     | y | 122 | 0 | 122 | 0 | Epithelial | normal | normal |
| 4765 | 99  |   |   | y (all coding exons)                         |      |     | y | 48  | 0 | 48  | 0 | Epithelial | normal | normal |
| 4773 | 131 |   |   | y (all coding exons)                         |      |     | y | 69  | 0 | 69  | 0 | Mixed      | normal | normal |
| 4778 | 61  |   |   | y (all coding exons)                         |      |     | y | 88  | 0 | 88  | 0 | Mixed      | normal | normal |
| 4783 | 127 |   |   | y (all coding exons)                         |      |     | y | 66  | 0 | 66  | 0 | Stromal    | normal | normal |
| 4788 | 81  |   |   | y (all coding exons)                         | P44L | n   |   | 86  | 0 | 86  | 0 | Regressive |        |        |
| 4802 | 342 |   |   |                                              |      |     | y | 80  | 0 | 80  | 0 | Blastemal  | normal | normal |
| 4807 | 120 |   |   | y (all coding exons)                         |      |     | y | 67  | 0 | 67  | 0 | Mixed      | normal | normal |
| 4897 | 132 | y | y |                                              |      |     | y | 28  | 0 | 28  | 0 | Stromal    | normal | normal |
| 4912 | 103 |   |   | y (all coding exons)                         |      |     | y | 15  | 1 | 25  | 1 | Diffuse AH | normal | normal |
| 4914 | 105 |   |   | y (all coding exons)                         |      |     |   | 79  | 0 | 79  | 0 | Regressive |        |        |
| 4918 | 111 | y | y |                                              |      |     |   | 88  | 0 | 88  | 0 | Mixed      |        |        |
| 4928 | 119 |   |   | y (all coding exons)                         |      |     |   | 69  | 0 | 69  | 0 | Mixed      |        |        |
| 4934 | 123 |   |   | y (all coding exons)                         |      |     | y | 70  | 0 | 70  | 0 | Mixed      | normal | normal |
| 4950 | 135 |   |   | y (all coding exons)                         |      |     |   | 62  | 0 | 62  | 0 | Regressive |        |        |
| 4956 | 136 |   |   | y (all coding exons)                         | P44L | n   |   | 55  | 0 | 55  | 0 | Regressive |        |        |
| 4968 | 137 |   |   | y (all coding exons)                         |      |     | y | 62  | 0 | 62  | 0 | Regressive | normal | normal |
| 5249 | 73  |   |   | y (all coding exons)                         |      |     |   | 19  | 1 | 98  | 0 | Regressive |        |        |
| 5252 | 84  |   |   | y (all coding exons)                         |      |     |   | 15  | 1 | 26  | 1 | Stromal    |        |        |
| 5254 | 87  |   |   | y (all coding exons)                         |      |     | y | 62  | 1 | 100 | 0 | Mixed      | normal | normal |
| 5258 | 101 |   |   | y (all coding exons)                         |      |     | y | 83  | 0 | 83  | 0 | Mixed      | normal | normal |
| 5260 | 109 |   |   | y (all coding exons)                         |      |     |   | 81  | 0 | 81  | 0 | Stromal    |        |        |
| 5666 | 69  | y | n |                                              |      |     | y | 12  | 1 | 32  | 1 | Diffuse AH | normal | normal |
| 6601 | 141 |   |   | y (all coding exons)                         |      |     |   | 44  | 0 | 44  | 0 | Mixed      |        |        |

|      |     |   |                      |       |   |   |     |   |     |   |            |        |        |
|------|-----|---|----------------------|-------|---|---|-----|---|-----|---|------------|--------|--------|
| 6603 | 141 |   |                      |       |   | y | 44  | 0 | 44  | 0 | Mixed      | normal | normal |
| 6613 | 144 |   | y (all coding exons) | P44L  | n |   | 42  | 0 | 42  | 0 | Mixed      |        |        |
| 6614 | 144 |   |                      |       |   | y | 42  | 0 | 42  | 0 | Mixed      | GAIN   | normal |
| 6993 | 147 | y | y                    |       |   | y | 0   | 1 | 54  | 0 | Stromal    | normal | normal |
| 7000 | 153 |   | y (all coding exons) |       |   |   | 44  | 0 | 44  | 0 | Diffuse AH |        |        |
| 7422 | 138 |   | y (all coding exons) |       |   |   | 64  | 0 | 64  | 0 | Regressive |        |        |
| 7426 | 63  | y | y                    |       |   | y | 8   | 1 | 97  | 0 | Regressive | normal | normal |
| 7432 | 58  |   | y (all coding exons) |       |   |   | 97  | 0 | 97  | 0 | Epithelial |        |        |
| 7434 | 56  |   | y (all coding exons) |       |   | y | 102 | 0 | 102 | 0 | Regressive | normal | normal |
| 7436 | 9   |   | y (all coding exons) |       |   | y | 131 | 0 | 131 | 0 | Mixed      | normal | normal |
| 7462 | 182 |   | y (all coding exons) |       |   | y | 94  | 0 | 94  | 0 | Mixed      | normal | normal |
| 7464 | 183 |   | y (all coding exons) |       |   | y | 99  | 0 | 99  | 0 | Mixed      | GAIN   | normal |
| 7478 | 184 |   | y (all coding exons) |       |   | y | 112 | 0 | 112 | 0 | Blastemal  | normal | normal |
| 7482 | 185 |   | y (all coding exons) |       |   | y | 7   | 1 | 87  | 0 | Regressive | GAIN   | GAIN   |
| 7484 | 186 |   | y (all coding exons) |       |   | y | 86  | 0 | 86  | 0 | Mixed      | normal | normal |
| 7488 | 187 |   | y (all coding exons) |       |   | y | 55  | 0 | 55  | 0 | Stromal    | normal | normal |
| 7490 | 188 |   | y (all coding exons) |       |   | y | 85  | 0 | 85  | 0 | Mixed      | GAIN   | normal |
| 7492 | 189 |   | y (all coding exons) |       |   | y | 88  | 0 | 88  | 0 | Regressive | normal | normal |
| 7498 | 190 |   | y (all coding exons) |       |   | y | 58  | 0 | 58  | 0 | Mixed      | normal | normal |
| 7502 | 191 |   | y (all coding exons) |       |   |   | 57  | 0 | 57  | 0 | Stromal    |        |        |
| 7506 | 192 |   | y (all coding exons) |       |   | y | 39  | 0 | 39  | 0 | Mixed      | normal | normal |
| 7512 | 195 |   | y (all coding exons) | A158V | y | y | 64  | 0 | 64  | 0 | Stromal    | GAIN   | GAIN   |
| 7514 | 194 |   | y (all coding exons) |       |   | y | 71  | 0 | 17  | 1 | Mixed      | normal | normal |
| 7533 | 196 |   | y (all coding exons) |       |   | y | 64  | 0 | 64  | 0 | Epithelial | normal | normal |
| 7537 | 197 |   | y (all coding exons) |       |   | y | 25  | 0 | 25  | 0 | Diffuse AH | normal | normal |
| 7539 | 200 |   | y (all coding exons) |       |   | y | 12  | 1 | 48  | 1 | Diffuse AH | GAIN   | GAIN   |
| 7541 | 198 |   | y (all coding exons) |       |   | y | 7   | 1 | 26  | 1 | Regressive | normal | normal |
| 7545 | 199 |   | y (all coding exons) |       |   | y | 69  | 0 | 69  | 0 | Epithelial | normal | normal |
| 7552 | 201 |   | y (all coding exons) |       |   | y | 47  | 0 | 47  | 0 | Stromal    | normal | normal |
| 7555 | 202 |   | y (all coding exons) |       |   | y | 59  | 0 | 59  | 0 | Stromal    | normal | normal |
| 7561 | 206 |   | y (all coding exons) |       |   | y | 51  | 0 | 51  | 0 | Regressive | normal | normal |
| 7563 | 204 |   | y (all coding exons) |       |   | y | 53  | 0 | 53  | 0 | Stromal    | normal | normal |
| 7567 | 207 |   | y (all coding exons) |       |   |   | 1   | 1 | 9   | 1 | Diffuse AH |        |        |
| 7570 | 209 |   | y (all coding exons) |       |   | y | 45  | 0 | 45  | 0 | Regressive | normal | normal |
| 7574 | 212 |   | y (all coding exons) |       |   | y | 39  | 0 | 39  | 0 | Diffuse AH | normal | normal |
| 7578 | 215 |   | y (all coding exons) |       |   | y | 19  | 1 | 31  | 1 | Blastemal  | GAIN   | normal |
| 7582 | 211 |   | y (all coding exons) |       |   |   | 17  | 1 | 19  | 1 | Diffuse AH |        |        |
| 7584 | 218 |   | y (all coding exons) |       |   | y | 35  | 0 | 35  | 0 | Mixed      | normal | normal |
| 7595 | 203 |   | y (all coding exons) |       |   | y | 11  | 0 | 11  | 1 | Diffuse AH | normal | normal |
| 7597 | 205 |   | y (all coding exons) |       |   |   | 39  | 0 | 39  | 0 | Mixed      |        |        |
| 7601 | 193 |   | y (all coding exons) |       |   | y | 10  | 0 | 10  | 0 | Stromal    | normal | normal |
| 7605 | 208 |   | y (all coding exons) |       |   |   | 33  | 0 | 33  | 0 | Mixed      |        |        |
| 7609 | 210 |   | y (all coding exons) |       |   |   | 31  | 0 | 31  | 0 | N/A        |        |        |
| 7613 | 216 |   | y (all coding exons) |       |   | y | 23  | 0 | 23  | 0 | Mixed      | normal | normal |
| 7615 | 213 |   | y (all coding exons) |       |   | y | 29  | 0 | 29  | 0 | Mixed      | normal | normal |
| 7617 | 214 |   | y (all coding exons) |       |   | y | 4   | 1 | 12  | 1 | Diffuse AH | normal | normal |
| 7621 | 219 |   | y (all coding exons) |       |   |   | 16  | 0 | 16  | 0 | Mixed      |        |        |
| 7623 | 217 |   | y (all coding exons) |       |   | y | 20  | 0 | 20  | 0 | Stromal    | normal | normal |
| 7639 | 309 |   |                      |       |   | y | 129 | 0 | 129 | 0 | Regressive | normal | normal |
| 7640 | 312 |   |                      |       |   | y | 121 | 0 | 121 | 0 | Mixed      | normal | normal |
| 7642 | 310 |   |                      |       |   | y | 86  | 0 | 86  | 0 | Mixed      | normal | normal |
| 7643 | 311 |   |                      |       |   | y | 72  | 0 | 72  | 0 | Blastemal  | normal | normal |
| 7645 | 313 |   |                      |       |   | y | 109 | 0 | 109 | 0 | Stromal    | normal | normal |
| 7650 | 314 |   |                      |       |   | y | 164 | 0 | 164 | 0 | Blastemal  | normal | normal |
| 7655 | 316 |   |                      |       |   | y | 108 | 0 | 108 | 0 | Mixed      | normal | normal |
| 7660 | 315 |   |                      |       |   | y | 102 | 0 | 102 | 0 | Diffuse AH | normal | normal |
| 7662 | 308 |   |                      |       |   | y | 5   | 1 | 11  | 1 | Blastemal  | GAIN   | normal |
| 7674 | 317 |   |                      |       |   | y | 150 | 0 | 150 | 0 | Regressive | normal | normal |
| 7678 | 221 |   |                      |       |   | y | 69  | 0 | 69  | 0 | Mixed      | normal | normal |
| 7679 | 318 |   |                      |       |   | y | 134 | 0 | 134 | 0 | Mixed      | normal | normal |
| 7680 | 220 |   |                      |       |   | y | 62  | 0 | 62  | 0 | Epithelial | normal | normal |
| 7682 | 222 |   |                      |       |   | y | 139 | 0 | 139 | 0 | Blastemal  | normal | normal |
| 7683 | 223 |   |                      |       |   | y | 105 | 0 | 105 | 0 | Regressive | normal | normal |
| 7684 | 224 |   |                      |       |   | y | 83  | 0 | 83  | 0 | Mixed      | normal | normal |
| 7691 | 225 |   |                      |       |   | y | 126 | 0 | 126 | 0 | Regressive | normal | normal |
| 7693 | 226 |   |                      |       |   | y | 122 | 0 | 122 | 0 | Mixed      | normal | normal |
| 7698 | 227 |   |                      |       |   | y | 41  | 1 | 126 | 0 | Focal AH   | normal | normal |
| 7708 | 228 |   |                      |       |   | y | 101 | 0 | 101 | 0 | Mixed      | GAIN   | GAIN   |
| 7725 | 230 |   |                      |       |   | y | 9   | 1 | 105 | 0 | Regressive | normal | normal |
| 7726 | 229 |   |                      |       |   | y | 70  | 0 | 70  | 0 | Regressive | normal | normal |
| 7729 | 231 |   |                      |       |   | y | 61  | 0 | 61  | 0 | Regressive | GAIN   | normal |
| 7854 | 232 |   |                      |       |   | y | 82  | 0 | 82  | 0 | Mixed      | GAIN   | normal |

|      |     |  |  |  |  |   |    |   |    |   |            |        |        |
|------|-----|--|--|--|--|---|----|---|----|---|------------|--------|--------|
| 7893 | 233 |  |  |  |  | y | 88 | 0 | 88 | 0 | Stromal    | GAIN   | normal |
| 7927 | 234 |  |  |  |  | y | 80 | 0 | 80 | 0 | Stromal    | normal | normal |
| 7935 | 235 |  |  |  |  | y | 69 | 0 | 69 | 0 | Regressive | GAIN   | normal |
| 7941 | 236 |  |  |  |  | y | 11 | 0 | 11 | 0 | Stromal    | normal | normal |
| 7952 | 237 |  |  |  |  | y | 74 | 0 | 74 | 0 | Regressive | normal | normal |
| 8011 | 238 |  |  |  |  | y | 62 | 0 | 62 | 0 | Regressive | LOSS   | LOSS   |
| 8014 | 239 |  |  |  |  | y | 61 | 0 | 61 | 0 | Stromal    | normal | normal |
| 8016 | 240 |  |  |  |  | y | 62 | 0 | 62 | 0 | Blastemal  | normal | normal |
| 8024 | 242 |  |  |  |  | y | 58 | 0 | 58 | 0 | Regressive | normal | normal |
| 8025 | 241 |  |  |  |  | y | 62 | 0 | 62 | 0 | Regressive | normal | normal |
| 8030 | 243 |  |  |  |  | y | 62 | 0 | 62 | 0 | Mixed      | normal | normal |
| 8043 | 244 |  |  |  |  | y | 60 | 0 | 60 | 0 | Stromal    | normal | normal |
| 8052 | 245 |  |  |  |  | y | 58 | 0 | 58 | 0 | Stromal    | normal | normal |
| 8066 | 246 |  |  |  |  | y | 47 | 0 | 47 | 0 | Mixed      | normal | normal |
| 8067 | 247 |  |  |  |  | y | 43 | 0 | 43 | 0 | Stromal    | normal | normal |
| 8075 | 249 |  |  |  |  | y | 58 | 0 | 58 | 0 | Mixed      | normal | normal |
| 8077 | 250 |  |  |  |  | y | 55 | 0 | 55 | 0 | Stromal    | normal | normal |
| 8094 | 248 |  |  |  |  | y | 50 | 0 | 50 | 0 | Stromal    | normal | normal |
| 8099 | 251 |  |  |  |  | y | 53 | 0 | 53 | 0 | Stromal    | normal | normal |
| 8101 | 252 |  |  |  |  | y | 55 | 0 | 55 | 0 | Regressive | GAIN   | normal |
| 8102 | 253 |  |  |  |  | y | 52 | 0 | 52 | 0 | Stromal    | normal | normal |
| 8109 | 254 |  |  |  |  | y | 50 | 0 | 50 | 0 | Mixed      | normal | LOSS   |
| 8112 | 256 |  |  |  |  | y | 37 | 0 | 37 | 0 | Mixed      | normal | LOSS   |
| 8113 | 255 |  |  |  |  | y | 6  | 1 | 29 | 0 | Regressive | normal | normal |
| 8122 | 258 |  |  |  |  | y | 49 | 0 | 49 | 0 | Regressive | normal | normal |
| 8125 | 259 |  |  |  |  | y | 28 | 0 | 28 | 0 | Regressive | normal | LOSS   |
| 8127 | 257 |  |  |  |  | y | 52 | 0 | 52 | 0 | Blastemal  | normal | normal |
| 8128 | 260 |  |  |  |  | y | 45 | 0 | 45 | 0 | Mixed      | normal | LOSS   |
| 8143 | 261 |  |  |  |  | y | 26 | 0 | 26 | 0 | Regressive | normal | normal |
| 8146 | 262 |  |  |  |  | y | 45 | 0 | 45 | 0 | Mixed      | normal | normal |
| 8157 | 263 |  |  |  |  | y | 46 | 0 | 46 | 0 | Regressive | normal | normal |
| 8162 | 266 |  |  |  |  | y | 43 | 0 | 43 | 0 | Mixed      | normal | normal |
| 8163 | 264 |  |  |  |  | y | 41 | 0 | 41 | 0 | Stromal    | normal | LOSS   |
| 8170 | 265 |  |  |  |  | y | 43 | 0 | 43 | 0 | Regressive | normal | LOSS   |
| 8180 | 267 |  |  |  |  | y | 41 | 0 | 41 | 0 | Mixed      | normal | LOSS   |
| 8187 | 268 |  |  |  |  | y | 29 | 0 | 29 | 0 | Stromal    | normal | normal |
| 8197 | 270 |  |  |  |  | y | 37 | 0 | 37 | 0 | Mixed      | normal | normal |
| 8200 | 269 |  |  |  |  | y | 38 | 0 | 38 | 0 | Regressive | normal | normal |
| 8209 | 272 |  |  |  |  | y | 28 | 0 | 28 | 0 | Regressive | normal | normal |
| 8217 | 273 |  |  |  |  | y | 36 | 0 | 36 | 0 | Regressive | GAIN   | normal |
| 8222 | 274 |  |  |  |  | y | 32 | 0 | 32 | 0 | Regressive | normal | normal |
| 8225 | 275 |  |  |  |  | y | 15 | 0 | 15 | 0 | Regressive | normal | normal |
| 8232 | 279 |  |  |  |  | y | 15 | 0 | 15 | 0 | Mixed      | normal | LOSS   |
| 8233 | 276 |  |  |  |  | y | 20 | 0 | 20 | 0 | Mixed      | normal | normal |
| 8236 | 277 |  |  |  |  | y | 18 | 0 | 18 | 0 | Stromal    | normal | normal |
| 8243 | 278 |  |  |  |  | y | 30 | 0 | 30 | 0 | Regressive | normal | normal |
| 8248 | 280 |  |  |  |  | y | 30 | 0 | 30 | 0 | Regressive | normal | normal |
| 8249 | 281 |  |  |  |  | y | 30 | 0 | 30 | 0 | Mixed      | normal | normal |
| 8252 | 282 |  |  |  |  | y | 2  | 0 | 2  | 0 | Regressive | normal | normal |
| 8254 | 283 |  |  |  |  | y | 18 | 0 | 18 | 0 | Regressive | normal | normal |
| 8255 | 287 |  |  |  |  | y | 27 | 0 | 27 | 0 | Mixed      | GAIN   | normal |
| 8257 | 285 |  |  |  |  | y | 26 | 0 | 26 | 0 | Regressive | normal | normal |
| 8267 | 291 |  |  |  |  | y | 26 | 0 | 26 | 0 | Regressive | normal | normal |
| 8268 | 284 |  |  |  |  | y | 26 | 0 | 26 | 0 | Stromal    | normal | LOSS   |
| 8269 | 288 |  |  |  |  | y | 26 | 1 | 28 | 0 | Blastemal  | normal | LOSS   |
| 8271 | 289 |  |  |  |  | y | 3  | 1 | 25 | 0 | Regressive | GAIN   | LOSS   |
| 8272 | 293 |  |  |  |  | y | 26 | 0 | 26 | 0 | Mixed      | normal | normal |
| 8274 | 292 |  |  |  |  | y | 27 | 0 | 27 | 0 | Regressive | normal | normal |
| 8277 | 286 |  |  |  |  | y | 27 | 0 | 27 | 0 | Stromal    | normal | normal |
| 8278 | 271 |  |  |  |  | y |    |   |    |   | Regressive | normal | normal |
| 8281 | 294 |  |  |  |  | y | 24 | 0 | 24 | 0 | Stromal    | normal | normal |
| 8282 | 296 |  |  |  |  | y | 23 | 0 | 23 | 0 | Mixed      | normal | normal |
| 8286 | 295 |  |  |  |  | y | 24 | 0 | 24 | 0 | Blastemal  | normal | normal |
| 8287 | 290 |  |  |  |  | y | 25 | 0 | 25 | 0 | Mixed      | normal | normal |
| 8293 | 297 |  |  |  |  | y | 23 | 0 | 23 | 0 | Blastemal  | normal | normal |
| 8300 | 298 |  |  |  |  | y | 17 | 0 | 17 | 0 | Mixed      | normal | normal |
| 8304 | 300 |  |  |  |  | y | 7  | 1 | 19 | 0 | Mixed      | normal | normal |
| 8305 | 299 |  |  |  |  | y | 18 | 0 | 18 | 0 | Regressive | normal | normal |
| 8307 | 301 |  |  |  |  | y | 17 | 0 | 17 | 0 | Mixed      | normal | normal |
| 8308 | 304 |  |  |  |  | y | 18 | 0 | 18 | 0 | Mixed      | normal | LOSS   |
| 8310 | 303 |  |  |  |  | y | 10 | 1 | 17 | 0 | Diffuse AH | normal | LOSS   |
| 8311 | 305 |  |  |  |  | y | 8  | 1 | 19 | 0 | Mixed      | normal | normal |

|       |     |   |   |                                       |       |     |     |     |     |     |            |            |        |        |
|-------|-----|---|---|---------------------------------------|-------|-----|-----|-----|-----|-----|------------|------------|--------|--------|
| 8312  | 302 |   |   |                                       |       | y   | 5   | 0   | 5   | 0   | Mixed      | normal     | LOSS   |        |
| 8313  | 306 |   |   |                                       |       | y   | 17  | 0   | 17  | 0   | Regressive | normal     | normal |        |
| 8314  | 307 |   |   |                                       |       | y   | 4   | 1   | 17  | 0   | Mixed      | normal     | normal |        |
| 8702  | 175 | y | n |                                       |       | y   | 31  | 0   | 31  | 0   | Stromal    | GAIN       | GAIN   |        |
| 8774  | 176 | y | n |                                       |       | y   | 30  | 0   | 30  | 0   | Stromal    | normal     | normal |        |
| 8783  | 178 | y | y | y (to confirm variant found in exome) | P44L  | n   | y   | 25  | 0   | 25  | 0          | Blastemal  | normal | normal |
| 8817  | 345 |   |   |                                       |       | y   | 26  | 0   | 26  | 0   | Regressive | normal     | normal |        |
| 8819  | 180 |   |   | y (all coding exons)                  | P44L  | n   |     | 26  | 0   | 26  | 0          | Regressive |        |        |
| 8834  | 177 |   |   | y (all coding exons)                  |       |     |     | 30  | 0   | 30  | 0          | Mixed      |        |        |
| 8837  | 177 |   |   |                                       |       | y   |     | 30  | 0   | 30  | 0          | Mixed      | GAIN   | normal |
| 8853  | 179 | y | y |                                       |       |     |     |     |     | 8   | 1          | Mixed      |        |        |
| 8855  | 179 |   |   |                                       |       | y   |     |     |     | 8   | 1          | Mixed      | normal | normal |
| 8860  | 346 |   |   |                                       |       | y   | 25  | 0   | 25  | 0   | Mixed      | normal     | normal |        |
| 8890  | 181 |   |   | y (all coding exons)                  |       |     |     | 26  | 0   | 26  | 0          | Mixed      |        |        |
| 8893  | 181 |   |   |                                       |       | y   | 26  | 0   | 26  | 0   | Mixed      | normal     | normal |        |
| 8896  | 1   | y | y |                                       |       |     |     |     |     |     |            | N/A        |        |        |
| 8903  | 166 |   |   | y (all coding exons)                  |       | y   | 36  | 0   | 36  | 0   | Regressive | GAIN       | normal |        |
| 8914  | 171 |   |   | y (all coding exons)                  | P63P  | ND  | y   | 7   | 1   | 34  | 0          | Mixed      | GAIN   | normal |
| 8922  | 165 |   |   | y (all coding exons)                  |       |     |     | 33  | 0   | 33  | 0          | Regressive |        |        |
| 8925  | 172 |   |   | y (all coding exons)                  |       | y   | 12  | 1   | 35  | 0   | Mixed      | GAIN       | GAIN   |        |
| 9048  | 161 |   |   | y (all coding exons)                  |       | y   | 45  | 0   | 45  | 0   | Diffuse AH | normal     | normal |        |
| 9115  | 159 |   |   | y (all coding exons)                  |       |     |     |     |     | 1   | 1          | Regressive |        |        |
| 9118  | 168 |   |   | y (all coding exons)                  |       | y   | 36  | 0   | 36  | 0   | Stromal    | normal     | normal |        |
| 9127  | 173 | y | y |                                       |       |     |     | 35  | 0   | 35  | 0          | Mixed      |        |        |
| 9128  | 173 |   |   |                                       |       | y   | 35  | 0   | 35  | 0   | Mixed      | normal     | normal |        |
| 9132  | 167 |   |   | y (all coding exons)                  |       | y   | 38  | 0   | 38  | 0   | Mixed      | normal     | normal |        |
| 9140  | 157 |   |   | y (all coding exons)                  | E69E  | ND  | y   | 43  | 0   | 43  | 0          | Regressive | normal | normal |
| 9161  | 49  |   |   | y (all coding exons)                  |       | y   | 109 | 0   | 109 | 0   | Epithelial | normal     | normal |        |
| 9165  | 80  |   |   | y (all coding exons)                  |       | y   | 98  | 0   | 98  | 0   | Diffuse AH | GAIN       | normal |        |
| 9173  | 118 |   |   | y (all coding exons)                  |       | y   | 76  | 0   | 76  | 0   | Epithelial | normal     | normal |        |
| 9179  | 125 |   |   | y (all coding exons)                  |       |     |     | 73  | 0   | 73  | 0          | Stromal    |        |        |
| 9189  | 64  | y | y |                                       |       |     |     | 17  | 1   | 17  | 1          | Diffuse AH |        |        |
| 9197  | 169 | y | y |                                       |       | y   | 35  | 0   | 35  | 0   | Blastemal  | normal     | normal |        |
| 9219  | 163 |   |   | y (all coding exons)                  |       | y   | 30  | 0   | 30  | 0   | Regressive | normal     | normal |        |
| 9224  | 162 |   |   | y (all coding exons)                  | E69E  | ND  |     | 32  | 0   | 32  | 0          | Regressive |        |        |
| 9413  | 140 |   |   | y (all coding exons)                  |       |     |     | 53  | 0   | 53  | 0          | Blastemal  |        |        |
| 9415  | 139 |   |   | y (all coding exons)                  |       |     |     | 56  | 0   | 56  | 0          | Mixed      |        |        |
| 9431  | 164 |   |   | y (all coding exons)                  | P365A | N/A |     | 39  | 0   | 39  | 0          | Regressive |        |        |
| 9442  | 133 | y | n |                                       |       | y   | 59  | 0   | 59  | 0   | Mixed      | normal     | normal |        |
| 9455  | 134 |   |   | y (all coding exons)                  |       | y   | 58  | 0   | 58  | 0   | Mixed      | normal     | normal |        |
| 9460  | 50  |   |   | y (all coding exons)                  |       |     |     | 14  | 1   | 111 | 0          | Stromal    |        |        |
| 9462  | 170 |   |   | y (all coding exons)                  |       |     |     | 36  | 0   | 36  | 0          | Mixed      |        |        |
| 9532  | 145 | y | y |                                       |       | y   | 40  | 0   | 40  | 0   | Focal AH   | GAIN       | GAIN   |        |
| 9537  | 158 |   |   | y (all coding exons)                  |       |     |     | 32  | 0   | 32  | 0          | Diffuse AH |        |        |
| 9543  | 142 |   |   | y (all coding exons)                  |       | y   | 46  | 0   | 46  | 0   | Stromal    | normal     | normal |        |
| 9547  | 156 |   |   | y (all coding exons)                  |       |     |     | 11  | 0   | 17  | 1          | N/A        |        |        |
| 9554  | 18  |   |   | y (all coding exons)                  |       | y   | 87  | 0   | 87  | 0   | Stromal    | normal     | normal |        |
| 9574  | 155 |   |   | y (all coding exons)                  |       | y   | 44  | 0   | 44  | 0   | Mixed      | normal     | normal |        |
| 9629  | 152 |   |   | y (all coding exons)                  |       | y   | 14  | 0   | 14  | 0   | Epithelial | normal     | normal |        |
| 9645  | 32  |   |   | y (all coding exons)                  |       |     |     | 124 | 0   | 124 | 0          | Regressive |        |        |
| 9647  | 42  |   |   | y (all coding exons)                  |       | y   | 13  | 1   | 102 | 0   | Stromal    | normal     | normal |        |
| 9657  | 57  |   |   | y (all coding exons)                  |       | y   | 12  | 0   | 12  | 1   | Diffuse AH | normal     | normal |        |
| 9660  | 62  |   |   | y (all coding exons)                  |       | y   | 108 | 0   | 108 | 0   | Stromal    | normal     | normal |        |
| 9682  | 122 |   |   | y (all coding exons)                  |       | y   | 14  | 1   | 23  | 1   | Regressive | normal     | normal |        |
| 9702  | 129 |   |   | y (all coding exons)                  |       | y   | 38  | 1   | 76  | 0   | Epithelial | normal     | normal |        |
| 9707  | 130 |   |   | y (all coding exons)                  |       | y   | 66  | 0   | 66  | 0   | Mixed      | normal     | normal |        |
| 9709  | 148 |   |   | y (all coding exons)                  |       | y   | 75  | 0   | 75  | 0   | Blastemal  | normal     | normal |        |
| 9742  | 154 |   |   | y (all coding exons)                  |       | y   | 46  | 0   | 46  | 0   | Stromal    | normal     | normal |        |
| 9748  | 151 |   |   | y (all coding exons)                  |       | y   | 50  | 0   | 50  | 0   | Stromal    | normal     | normal |        |
| 9750  | 146 |   |   | y (all coding exons)                  | P44L  | n   |     | 54  | 0   | 54  | 0          | Mixed      |        |        |
| 9755  | 160 |   |   | y (all coding exons)                  |       | y   | 43  | 0   | 43  | 0   | Mixed      | normal     | normal |        |
| 9759  | 149 |   |   | y (all coding exons)                  |       | y   | 49  | 0   | 49  | 0   | Epithelial | normal     | normal |        |
| 9989  | 143 |   |   | y (all coding exons)                  |       |     |     | 43  | 0   | 43  | 0          | Mixed      |        |        |
| 9991  | 150 |   |   | y (all coding exons)                  |       |     |     | 40  | 0   | 40  | 0          | Mixed      |        |        |
| 10001 | 174 |   |   | y (all coding exons)                  |       |     |     | 23  | 0   | 23  | 0          | Stromal    |        |        |
| 11062 | 324 |   |   |                                       |       | y   | 67  | 0   | 67  | 0   | Mixed      | normal     | normal |        |
| 11063 | 328 |   |   |                                       |       | y   | 15  | 0   | 15  | 0   | Regressive | normal     | normal |        |
| 11065 | 323 |   |   |                                       |       | y   | 10  | 1   | 32  | 1   | Focal AH   | normal     | normal |        |
| 11066 | 322 |   |   |                                       |       | y   | 81  | 0   | 81  | 0   | Mixed      | normal     | normal |        |
| 11071 | 320 |   |   |                                       |       | y   | 9   | 1   | 103 | 0   | Regressive | normal     | normal |        |

|       |     |  |  |  |  |   |    |   |    |   |            |        |        |
|-------|-----|--|--|--|--|---|----|---|----|---|------------|--------|--------|
| 11072 | 327 |  |  |  |  | y | 74 | 0 | 74 | 0 | Mixed      | normal | normal |
| 11073 | 329 |  |  |  |  | y | 69 | 0 | 69 | 0 | Blastemal  | normal | normal |
| 11075 | 331 |  |  |  |  | y | 75 | 0 | 75 | 0 | Focal AH   | normal | normal |
| 11077 | 325 |  |  |  |  | y | 31 | 0 | 31 | 0 | Epithelial | normal | normal |
| 11078 | 330 |  |  |  |  | y | 46 | 0 | 46 | 0 | Regressive | normal | normal |
| 11079 | 321 |  |  |  |  | y |    |   |    |   | Stromal    | normal | normal |
| 11086 | 326 |  |  |  |  | y | 11 | 0 | 11 | 0 | Regressive | normal | normal |
| 11362 | 319 |  |  |  |  | y | 7  | 0 | 7  | 0 | Regressive | normal | normal |

## Supplementary Table 2



| ICH ID | Histology          | RFS (months) | Relapse | Expression log2 intensity | Expression log2 intensity | Segmented log2 copy number | methylation (M) | methylation (M) | methylation (M) | methylation (M) | methylation (M) | methylation (M) | methylation (M) | methylation (M) | methylation (M) | methylation (M) | methylation (M) | methylation (M) | methylation (M) | methylation (M) | methylation (M) | methylation (M) | methylation (M) | methylation (M) | methylation (M) | methylation (M) | methylation (M) |            |            |       |
|--------|--------------------|--------------|---------|---------------------------|---------------------------|----------------------------|-----------------|-----------------|-----------------|-----------------|-----------------|-----------------|-----------------|-----------------|-----------------|-----------------|-----------------|-----------------|-----------------|-----------------|-----------------|-----------------|-----------------|-----------------|-----------------|-----------------|-----------------|------------|------------|-------|
| 201    | Mixed              | 126          | 0       | 7.871                     | 6.961                     | 1.000                      | cg00814244      | cg22111507      | cg21352292      | cg10429747      | cg17519750      | cg24960731      | cg14512425      | cg16597172      | cg02204046      | cg1010986       | cg29050571      | cg4251733       | cg06520300      | cg48884624      | cg17362029      | cg13131095      | cg07488260      | cg01802533      | cg20431766      | cg17083806      | cg19623054      | cg04460992 | cg25074809 |       |
| 201    | Mixed              | 126          | 0       | 7.871                     | 6.961                     | 1.000                      | -4.104          | -5.471          | -4.993          | -5.301          | -5.362          | -5.505          | -3.841          | -4.376          | -3.539          | -3.151          | -4.080          | -3.435          | -4.139          | -3.643          | -5.210          | -4.010          | -3.248          | -2.866          | -1.631          | -1.039          | 3.018           | 4.151      | 5.471      |       |
| 201    | Mixed              | 4            | 1       | 9.750                     | 7.773                     | 1.000                      | -4.330          | -5.430          | -4.371          | -4.778          | -4.778          | -4.488          | -3.996          | -4.276          | -3.808          | -3.657          | -3.496          | -3.777          | -3.937          | -3.618          | -4.949          | -3.424          | -3.047          | -3.324          | -3.047          | -3.254          | -2.961          | 0.077      | 1.012      | 1.031 |
| 302    | Blastomal          | 2            | 1       | 10.194                    | 8.178                     | 1.000                      | -4.160          | -5.268          | -4.476          | -5.048          | -4.628          | -4.761          | -3.598          | -4.540          | -4.074          | -3.427          | -4.049          | -3.777          | -4.821          | -3.785          | -3.855          | -4.023          | -3.410          | -3.306          | -3.671          | -2.558          | 0.556           | 1.792      | 2.712      | 2.712 |
| 325    | Regressive         | 8            | 0       | 6.964                     | 6.859                     | 1.000                      | -4.300          | -4.807          | -4.276          | -4.687          | -4.694          | -4.604          | -3.371          | -4.061          | -3.509          | -3.425          | -3.071          | -3.657          | -3.647          | -3.081          | -3.851          | -3.076          | -3.110          | -2.807          | -1.835          | -1.157          | 2.031           | 2.699      | 3.352      |       |
| 115    | Stromal            | 90           | 0       | 7.276                     | 6.913                     | 1.000                      | -3.788          | -5.832          | -4.378          | -4.857          | -4.631          | -4.395          | -3.205          | -4.699          | -3.796          | -3.626          | -3.764          | -3.642          | -3.683          | -3.245          | -4.076          | -3.854          | -3.255          | -3.463          | -4.873          | -0.587          | 3.874           | 4.487      | 5.796      |       |
| 1493   | Mixed              | 93           | 0       | 11.604                    | 9.453                     | 1.000                      | -3.918          | -5.294          | -4.416          | -4.347          | -4.120          | -4.101          | -3.327          | -4.071          | -3.611          | -3.460          | -3.674          | -3.389          | -3.388          | -3.283          | -3.826          | -3.292          | -2.902          | -2.902          | -2.695          | -1.558          | 0.213           | 1.050      | 1.050      |       |
| 1706   | Diffuse Anaplastic | 90           | 0       | 10.183                    | 8.340                     | 1.585                      | -4.661          | -5.104          | -6.335          | -4.703          | -5.056          | -5.056          | -3.237          | -4.915          | -4.090          | -3.806          | -3.721          | -4.131          | -5.151          | -3.686          | -4.269          | -3.936          | -3.350          | -3.478          | -3.002          | -2.047          | 0.192           | 1.691      | 1.975      |       |
| 1781   | Epithelial         | 59           | 0       | 7.255                     | 6.899                     | 1.000                      | -3.803          | -5.740          | -5.079          | -4.341          | -4.108          | -4.540          | -3.556          | -4.175          | -3.704          | -3.448          | -3.399          | -3.089          | -3.579          | -3.624          | -4.256          | -4.035          | -3.462          | -3.235          | -1.822          | -1.113          | 2.898           | 3.292      | 4.139      |       |
| 2220   | Diffuse Anaplastic | 94           | 0       | 7.009                     | 6.824                     | 1.000                      | -3.541          | -4.748          | -4.744          | -4.367          | -4.386          | -3.501          | -4.203          | -4.083          | -3.479          | -3.367          | -3.348          | -3.047          | -3.322          | -3.891          | -3.391          | -3.136          | -3.222          | -2.718          | -1.622          | -1.485          | 2.784           | 3.163      | 3.107      |       |
| 2261   | Regressive         | 8            | 1       | 9.814                     | 8.481                     | 1.000                      | -4.609          | -5.980          | -7.637          | -4.442          | -5.159          | -4.965          | -3.580          | -4.039          | -3.799          | -3.986          | -3.732          | -4.143          | -4.074          | -3.775          | -5.253          | -4.068          | -3.003          | -3.070          | -3.334          | -3.508          | -2.781          | -1.783     | -2.098     |       |
| 2382   | Mixed              | 125          | 0       | 10.223                    | 7.983                     | 1.000                      | -3.727          | -5.170          | -3.657          | -4.397          | -4.344          | -4.436          | -3.358          | -3.677          | -3.825          | -3.298          | -3.433          | -3.329          | -3.488          | -3.558          | -4.255          | -3.468          | -3.273          | -2.918          | -2.469          | -1.731          | 0.338           | 1.709      | 1.078      |       |
| 2388   | Regressive         | 111          | 0       | 6.958                     | 6.833                     | 1.000                      | -4.284          | -4.807          | -5.004          | -4.644          | -4.188          | -4.322          | -3.366          | -4.140          | -3.961          | -3.895          | -3.485          | -3.464          | -3.167          | -3.595          | -3.206          | -3.666          | -3.433          | -3.233          | -3.363          | -2.581          | 1.873           | 2.804      | 3.526      |       |
| 2557   | Diffuse Anaplastic | 9            | 1       | 9.797                     | 7.747                     | 1.000                      | -3.921          | -5.526          | -4.033          | -4.226          | -4.500          | -4.250          | -3.558          | -4.261          | -3.721          | -3.452          | -3.304          | -4.040          | -3.984          | -3.504          | -4.867          | -3.769          | -3.117          | -2.824          | -3.055          | -2.539          | -1.604          | -0.630     | -0.694     |       |
| 2594   | Epithelial         | 10           | 1       | 10.701                    | 8.018                     | 1.000                      | -4.043          | -5.160          | -4.530          | -4.988          | -4.988          | -4.762          | -4.124          | -3.695          | -4.129          | -4.298          | -4.207          | -3.707          | -4.461          | -3.944          | -3.398          | -3.695          | -3.175          | -3.912          | -4.378          | -2.763          | -1.911          | -1.810     |            |       |
| 2652   | Mixed              | 111          | 0       | 8.211                     | 7.854                     | 1.000                      | -4.532          | -5.211          | -4.902          | -4.728          | -4.559          | -4.613          | -3.346          | -4.513          | -3.824          | -3.729          | -4.216          | -3.748          | -3.914          | -3.765          | -5.107          | -3.702          | -3.377          | -3.435          | -2.490          | -1.707          | 2.489           | 3.425      | 4.052      |       |
| 2663   | Stromal            | 116          | 0       | 6.907                     | 6.811                     | 1.000                      | -3.704          | -5.982          | -5.529          | -4.809          | -4.822          | -4.717          | -3.331          | -4.822          | -3.809          | -3.339          | -3.724          | -3.927          | -4.099          | -3.857          | -4.449          | -4.142          | -3.195          | -3.768          | -1.151          | -0.578          | 3.047           | 3.817      | 4.702      |       |
| 2664   | Mixed              | 106          | 0       | 7.624                     | 7.017                     | 1.000                      | -3.921          | -4.668          | -4.735          | -4.096          | -4.375          | -4.401          | -3.743          | -4.031          | -3.774          | -3.461          | -3.590          | -3.323          | -3.288          | -3.355          | -3.109          | -3.876          | -3.648          | -2.561          | -1.223          | -1.263          | 2.408           | 3.015      | 3.787      |       |
| 2716   | Blastomal          | 26           | 1       | 10.125                    | 8.353                     | 1.000                      | -3.769          | -5.214          | -4.827          | -5.086          | -4.300          | -4.435          | -3.268          | -4.132          | -3.814          | -3.459          | -3.492          | -3.953          | -3.761          | -3.685          | -3.662          | -3.471          | -3.168          | -2.727          | -2.884          | -1.956          | 1.873           | 2.804      | 3.432      |       |
| 2717   | Blastomal          | 90           | 0       | 10.303                    | 7.867                     | 1.000                      | -3.891          | -4.369          | -4.167          | -4.338          | -4.067          | -4.171          | -3.185          | -4.255          | -4.048          | -3.444          | -3.237          | -3.600          | -3.471          | -3.383          | -3.994          | -3.438          | -3.216          | -2.995          | -3.322          | -2.900          | -0.990          | -0.093     | 0.174      |       |
| 2720   | Blastomal          | 101          | 0       | 10.264                    | 8.388                     | 1.000                      | -4.153          | -5.087          | -4.253          | -4.266          | -4.186          | -4.319          | -3.436          | -4.079          | -3.783          | -3.496          | -3.307          | -3.676          | -3.149          | -3.272          | -4.618          | -3.710          | -3.211          | -2.998          | -3.539          | -3.191          | -1.067          | -0.265     | 0.444      |       |
| 2734   | Regressive         | 83           | 0       | 6.976                     | 6.994                     | 1.000                      | -4.513          | -5.225          | -4.796          | -4.409          | -4.521          | -4.470          | -3.348          | -4.422          | -3.899          | -3.647          | -3.393          | -3.618          | -3.515          | -3.714          | -4.414          | -3.588          | -3.287          | -2.687          | -1.523          | -1.012          | 2.782           | 3.249      | 4.240      |       |
| 2964   | Mixed              | 12           | 0       | 9.866                     | 7.878                     | 1.585                      | -4.124          | -4.816          | -3.734          | -3.912          | -3.990          | -4.392          | -3.456          | -3.930          | -4.168          | -3.460          | -3.400          | -3.915          | -3.357          | -3.489          | -3.973          | -3.608          | -3.287          | -2.672          | -3.148          | -4.227          | -0.371          | 1.055      | 1.019      |       |
| 2967   | Diffuse Anaplastic | 5            | 1       | 12.568                    | 11.195                    | 3.000                      | -2.745          | -4.817          | -5.008          | -2.873          | -3.533          | -3.458          | -2.531          | -3.243          | -2.473          | -3.920          | -2.522          | -3.150          | -3.211          | -2.729          | -4.806          | -2.153          | -2.333          | -3.015          | -2.675          | -2.718          | 0.841           | 0.939      | 2.676      |       |
| 2969   | Diffuse Anaplastic | 9            | 1       | 9.687                     | 7.738                     | 2.322                      | -4.316          | -5.351          | -5.129          | -4.588          | -4.879          | -4.729          | -3.093          | -4.339          | -3.759          | -3.754          | -3.149          | -3.872          | -3.849          | -4.043          | -4.573          | -3.547          | -3.109          | -2.815          | -2.224          | -1.470          | 0.758           | 1.803      | 2.170      |       |
| 2970   | Regressive         | 86           | 0       | 7.111                     | 6.805                     | 1.000                      | -4.638          | -5.761          | -4.690          | -4.684          | -4.367          | -4.490          | -3.254          | -4.573          | -3.902          | -3.850          | -3.329          | -3.322          | -3.873          | -3.776          | -3.475          | -4.194          | -3.521          | -2.899          | -1.623          | -0.948          | 2.373           | 2.672      | 3.787      |       |
| 2987   | Regressive         | 82           | 0       | 10.539                    | 8.255                     | 1.000                      | -4.064          | -5.164          | -4.677          | -4.627          | -4.304          | -4.306          | -3.517          | -3.949          | -3.905          | -3.289          | -3.447          | -3.742          | -3.900          | -3.575          | -3.970          | -3.506          | -3.328          | -2.655          | -3.919          | -1.054          | -3.084          | -2.855     | -2.271     |       |
| 2990   | Epithelial         | 61           | 1       | 8.424                     | 7.514                     | 1.000                      | -3.569          | -5.147          | -4.326          | -4.376          | -4.014          | -4.355          | -3.348          | -4.121          | -3.851          | -3.688          | -3.377          | -3.845          | -3.935          | -3.315          | -4.124          | -3.579          | -3.156          | -2.395          | -3.080          | -2.740          | -1.489          | -0.850     | -0.432     |       |
| 2994   | Epithelial         | 75           | 0       | 8.235                     | 7.323                     | 1.000                      | -3.591          | -5.968          | -5.066          | -4.253          | -4.102          | -4.052          | -3.479          | -4.095          | -4.042          | -3.279          | -3.436          | -3.676          | -3.786          | -3.737          | -3.534          | -3.346          | -3.389          | -2.856          | -2.174          | -1.547          | 0.803           | 2.221      | 1.648      |       |
| 3015   | Stromal            | 87           | 0       | 7.740                     | 7.028                     | 1.000                      | -3.889          | -4.968          | -3.709          | -4.353          | -4.251          | -4.426          | -3.340          | -4.010          | -3.728          | -3.432          | -3.438          | -3.330          | -3.601          | -3.731          | -3.661          | -3.499          | -3.222          | -2.754          | -3.560          | -4.131          | 2.133           | 2.357      | 4.830      |       |
| 3020   | Blastomal          | 5            | 1       | 10.994                    | 8.953                     | 2.000                      | -4.145          | -5.123          | -4.795          | -4.799          | -4.177          | -4.318          | -3.496          | -4.190          | -3.827          | -3.517          | -3.229          | -3.815          | -3.977          | -3.453          | -4.904          | -3.619          | -3.032          | -2.657          | -3.267          | -2.759          | -0.155          | 0.825      | 1.307      |       |
| 3136   | Stromal            | 102          | 0       | 7.772                     | 7.034                     | 1.000                      | -4.575          | -4.949          | -5.972          | -4.582          | -4.414          | -4.645          | -3.420          | -4.570          | -4.540          | -3.505          | -3.384          | -3.202          | -3.931          | -3.560          | -4.966          | -3.803          | -3.342          | -3.028          | -2.040          | -1.360          | 1.995           | 2.314      | 2.758      |       |
| 3140   | Stromal            | 97           | 0       | 7.382                     | 6.808                     | 1.585                      | -4.626          | -8.044          | -4.712          | -4.702          | -4.022          | -4.478          | -3.234          | -4.138          | -3.938          | -3.336          | -3.325          | -4.301          | -3.392          | -3.266          | -4.457          | -3.400          | -3.011          | -2.778          | -1.544          | -0.789          | 1.615           | 2.932      | 2.967      |       |
| 3143   | Diffuse Anaplastic | 105          | 0       | 10.464                    | 8.623                     | 1.000                      | -3.878          | -8.101          | -4.752          | -4.526          | -4.451          | -4.323          | -3.426          | -4.183          | -4.107          | -3.597          | -4.452          | -2.999          | -4.385          | -3.710          | -4.282          | -4.018          | -3.209          | -3.791          | -3.694          | -2.687          | -2.587          | -1.617     | -1.601     |       |
| 3145   | Diffuse Anaplastic | 118          | 1       | 10.448                    | 8.429                     | 1.000                      | -3.551          | -4.804          | -3.819          | -4.252          | -4.035          | -4.993          | -3.553          | -3.868          | -4.021          | -3.683          | -3.810          | -3.494          | -3.470          | -3.483          | -4.298          | -3.842          | -3.713          | -2.870          | -3.494          | -3.699          | -1.007          | 0.927      | 1.152      |       |
| 3148   | Mixed              | 38           | 0       | 7.781                     | 7.032                     | 1.000                      | -4.031          | -5.157          | -5.111          | -4.023          | -4.250          | -4.235          | -3.324          | -4.429          | -3.861          | -3.234          | -3.484          | -3.057          | -4.262          | -3.844          | -4.804          | -3.612          | -3.224          | -3.850          | -2.166          | -1.787          | 2.332           | 2.862      | 3.726      |       |
| 3150   | Regressive         | 78           | 0       | 7.157                     | 6.896                     | 1.000                      | -4.477          | -5.347          | -4.525          | -4.098          | -4.528          | -4.085          | -3.278          | -4.300          | -3.579          | -3.374          | -3.118          |                 |                 |                 |                 |                 |                 |                 |                 |                 |                 |            |            |       |

## Supplementary Figure 1

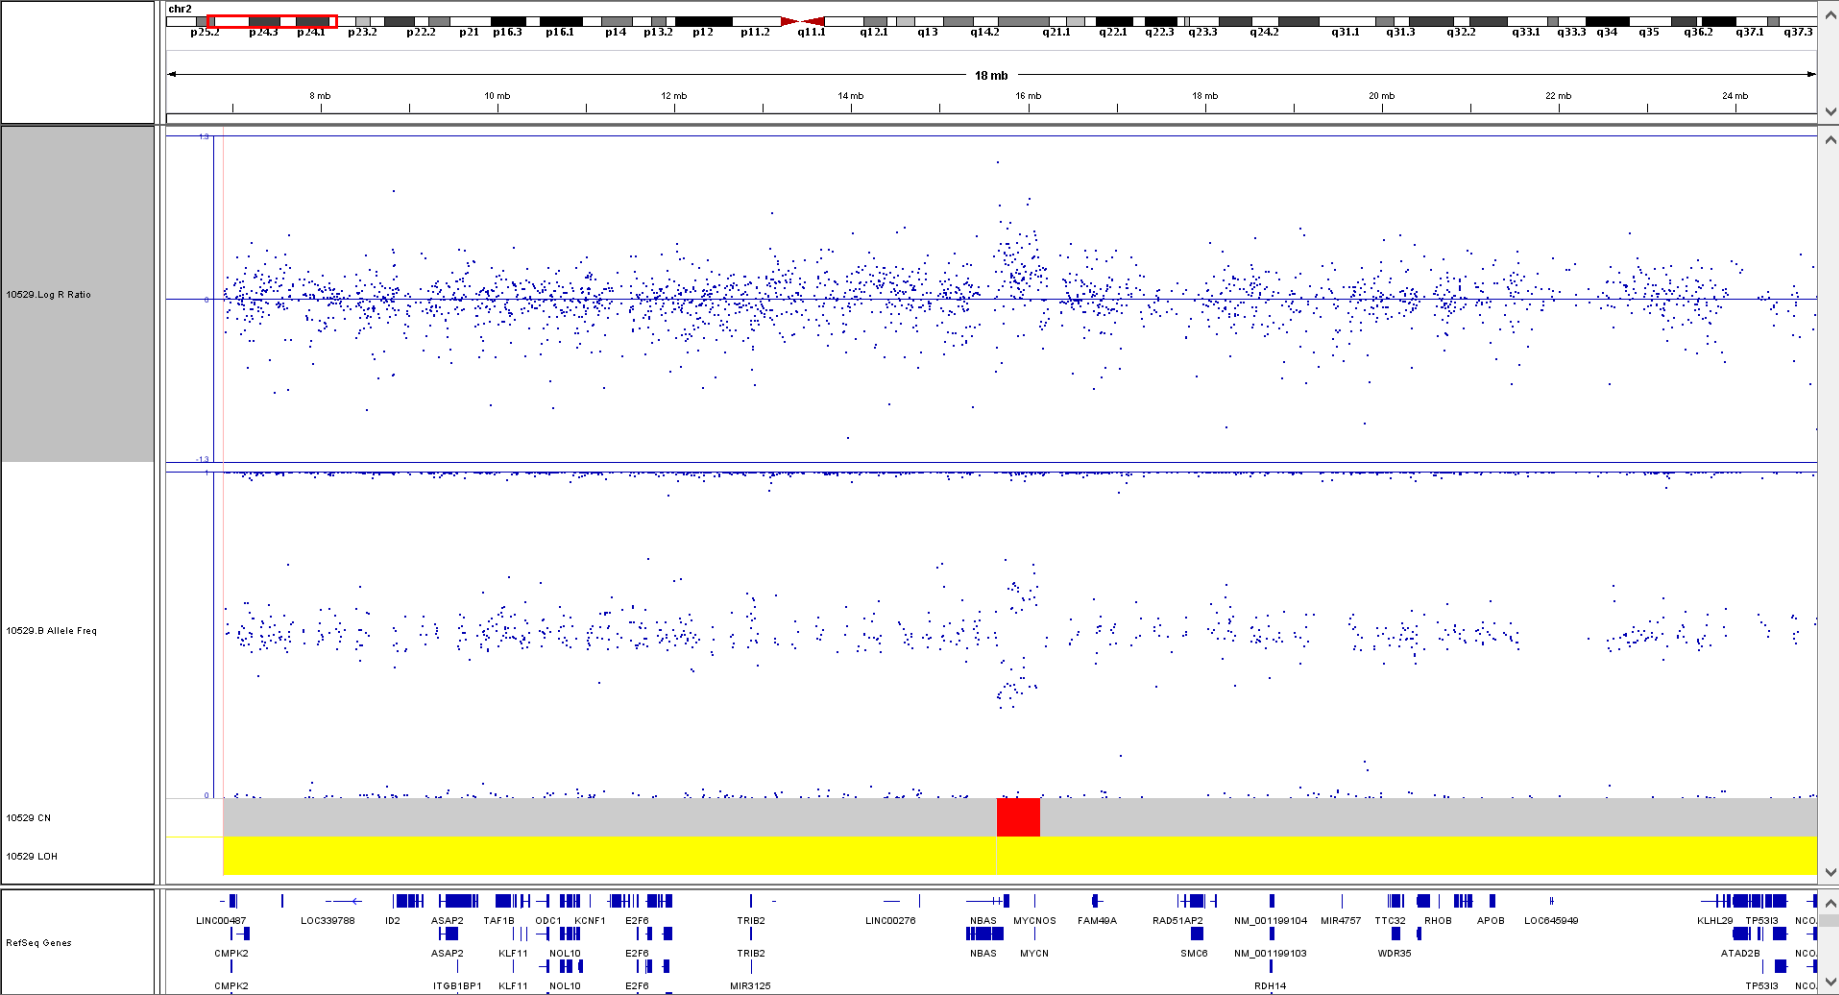

## Supplementary Figure 2

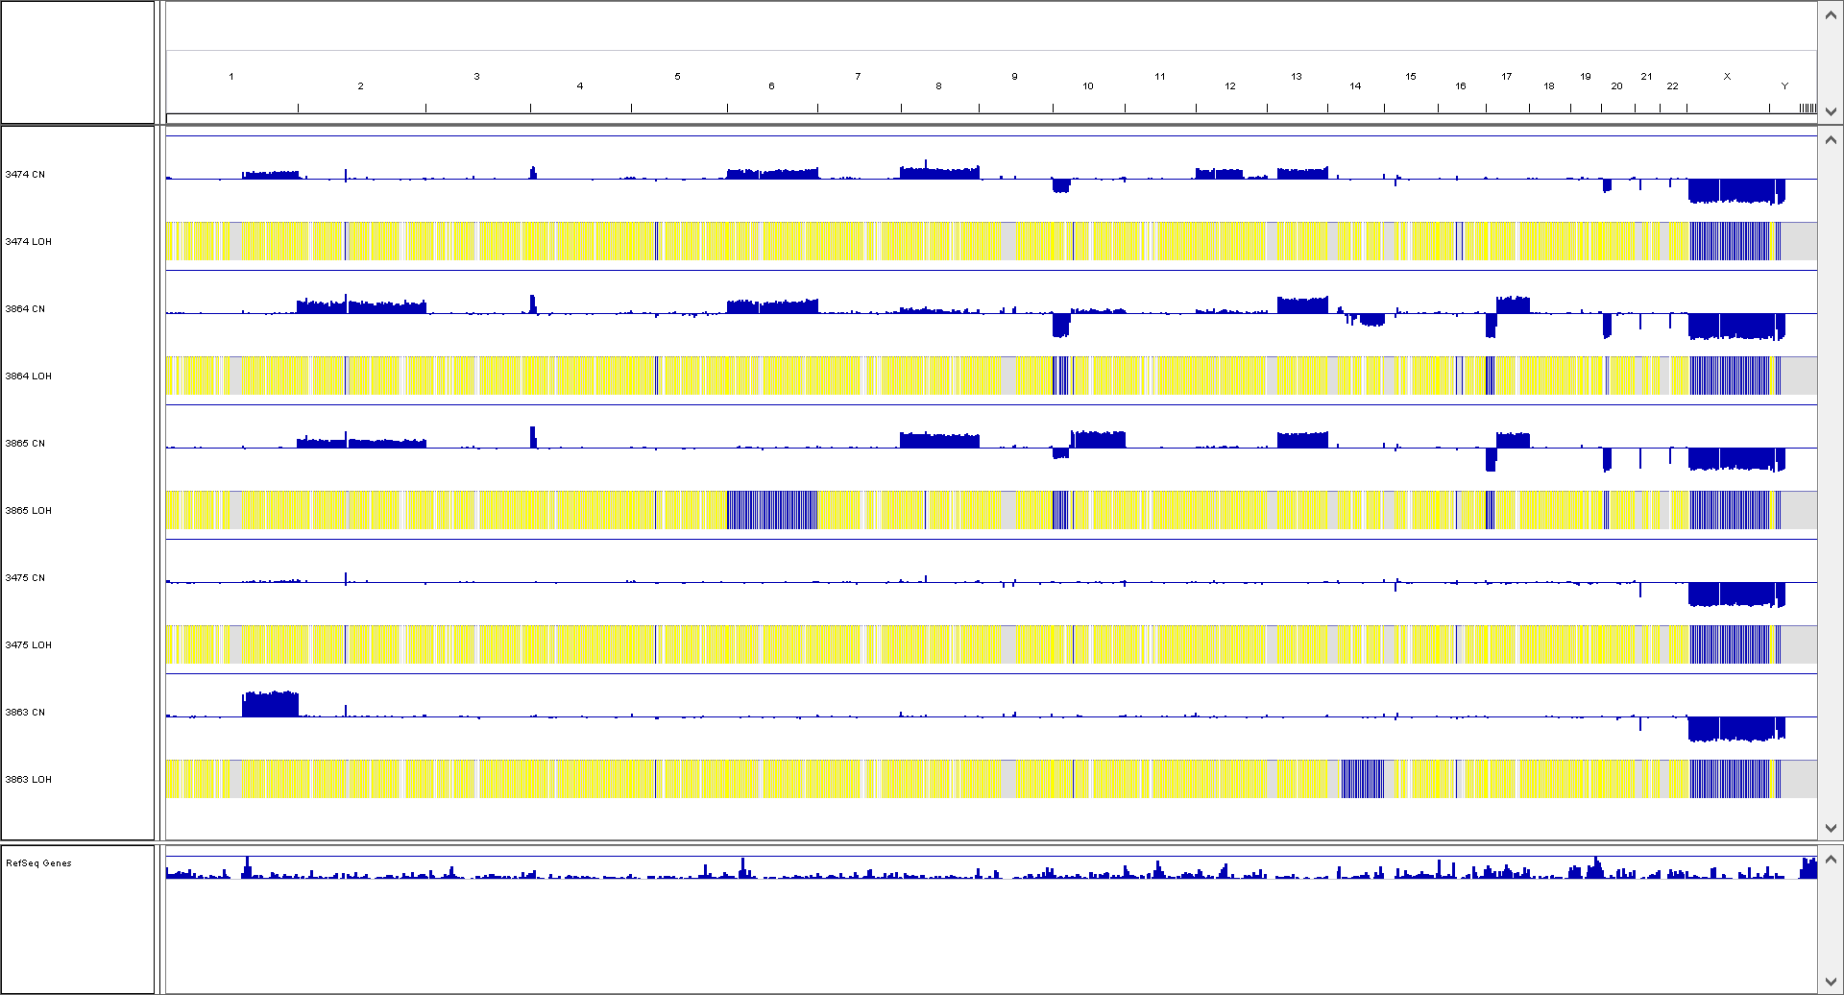

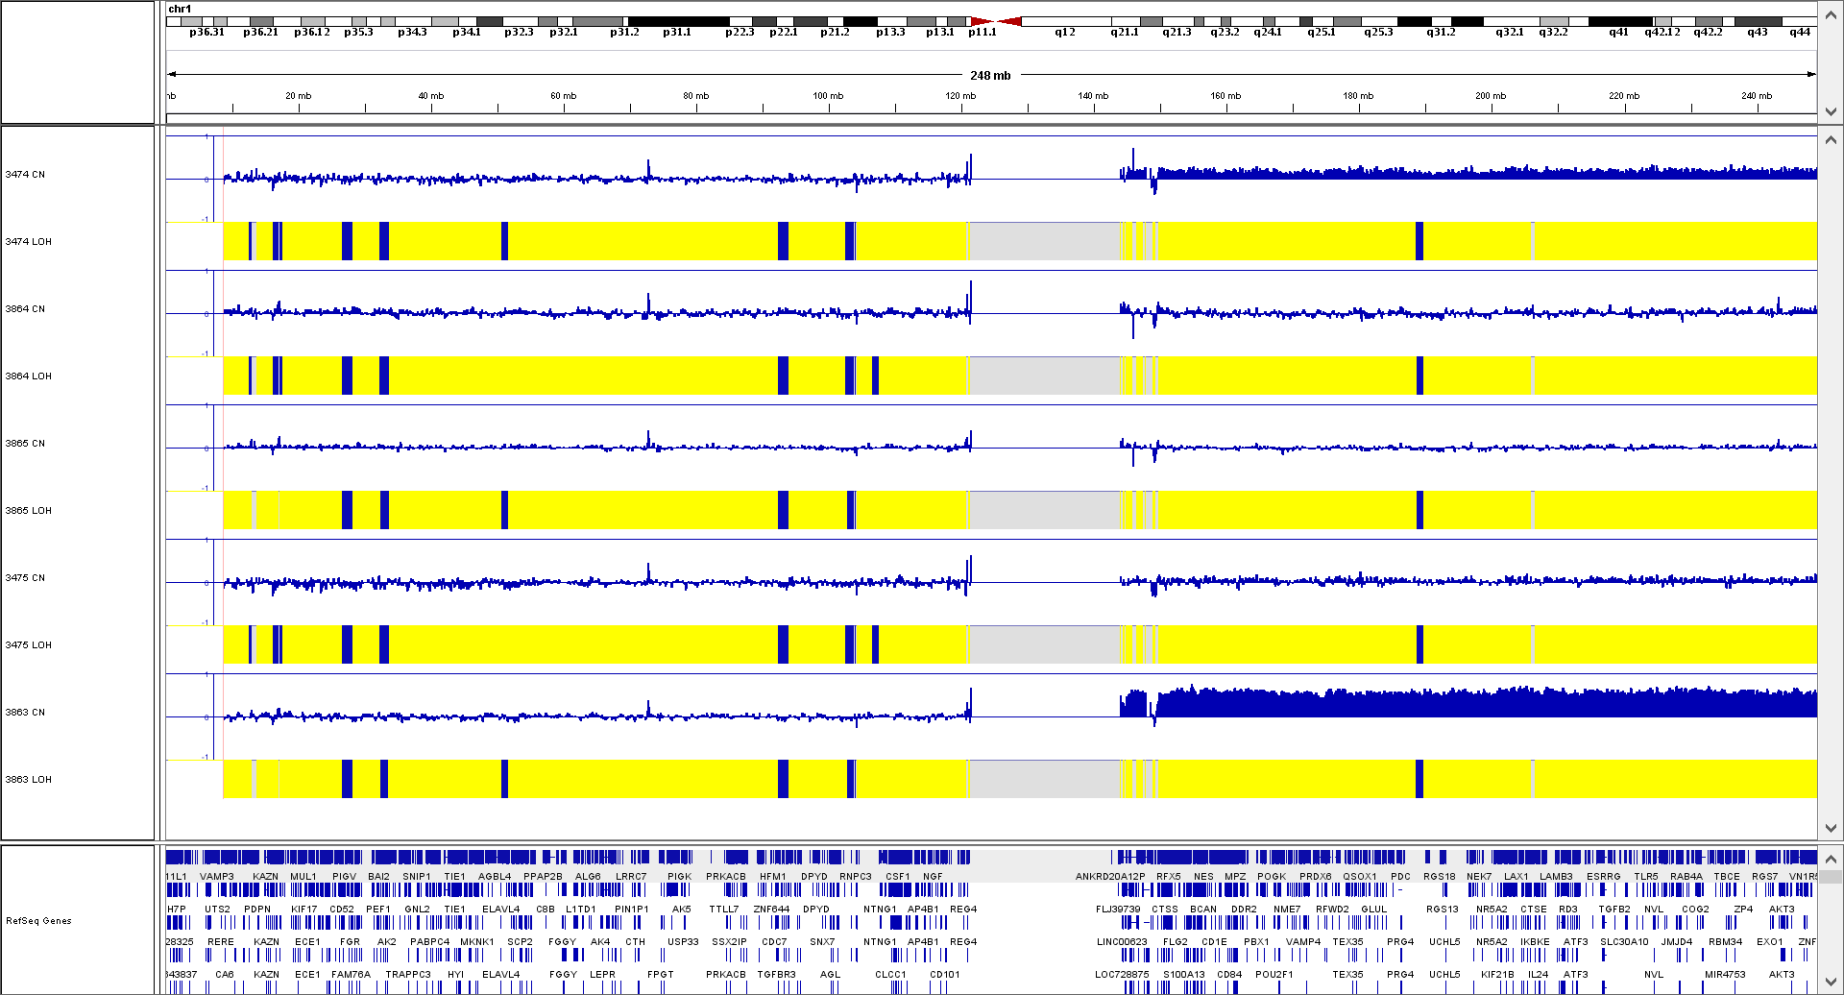

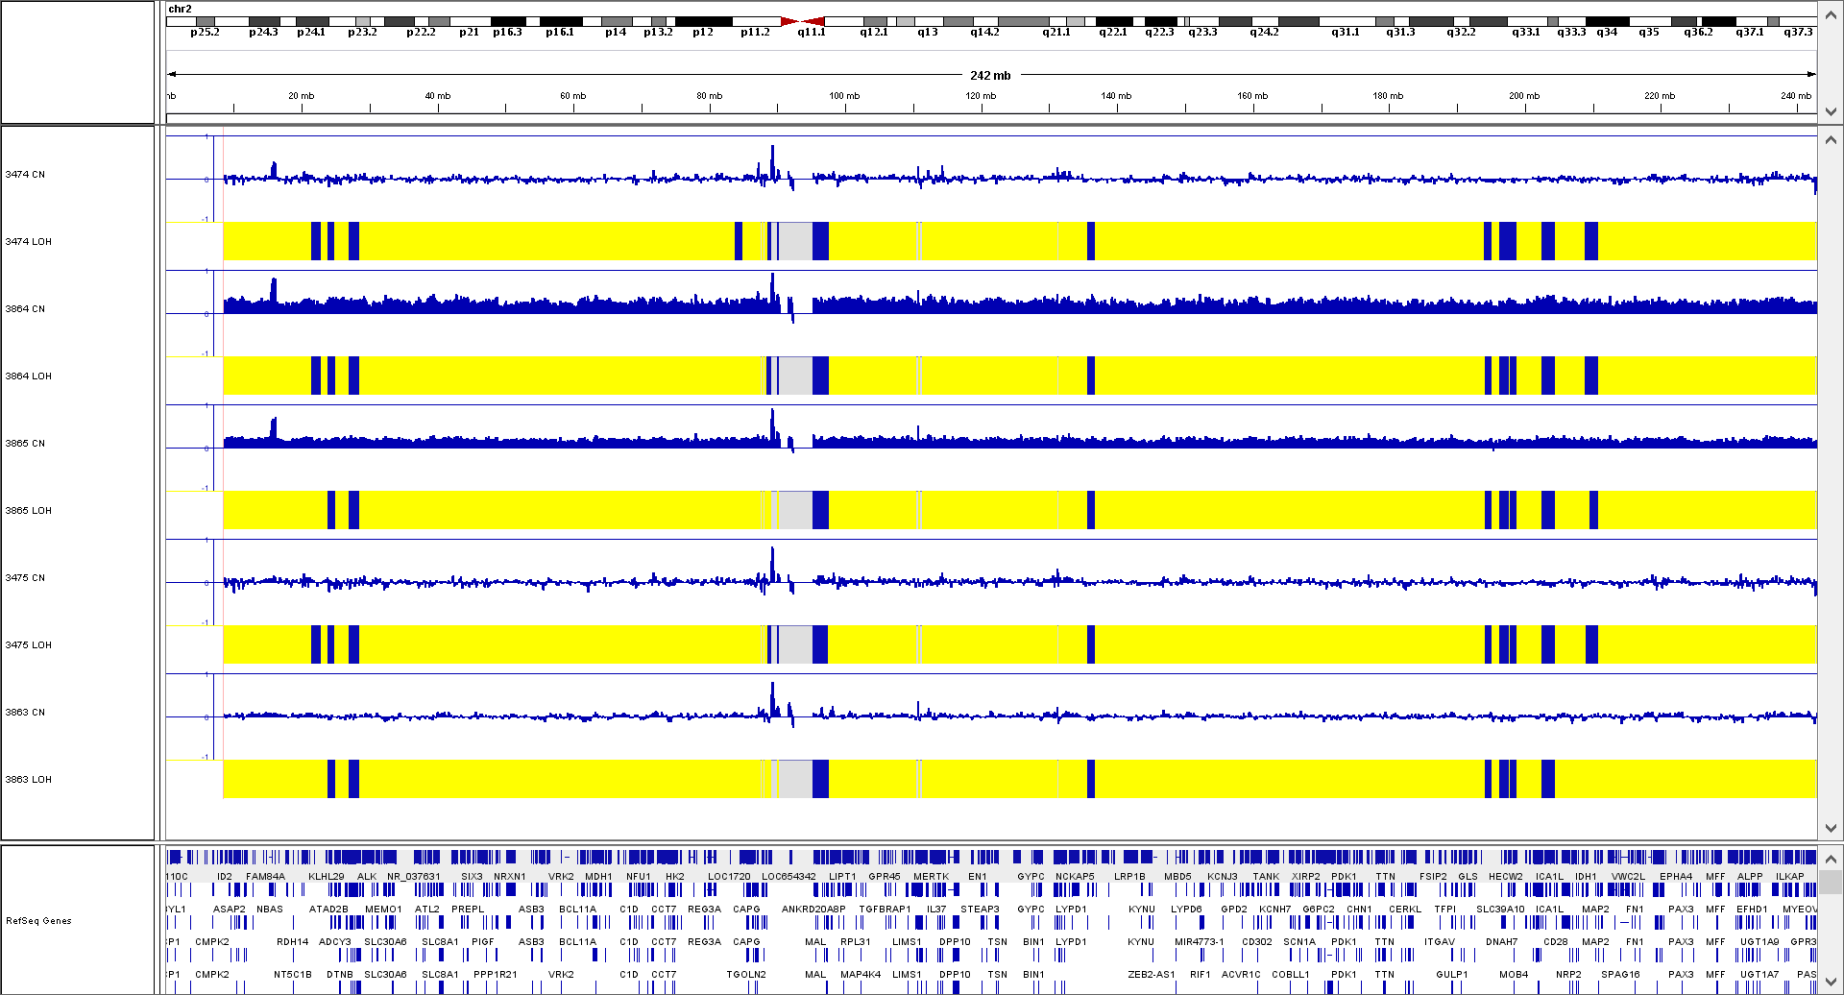

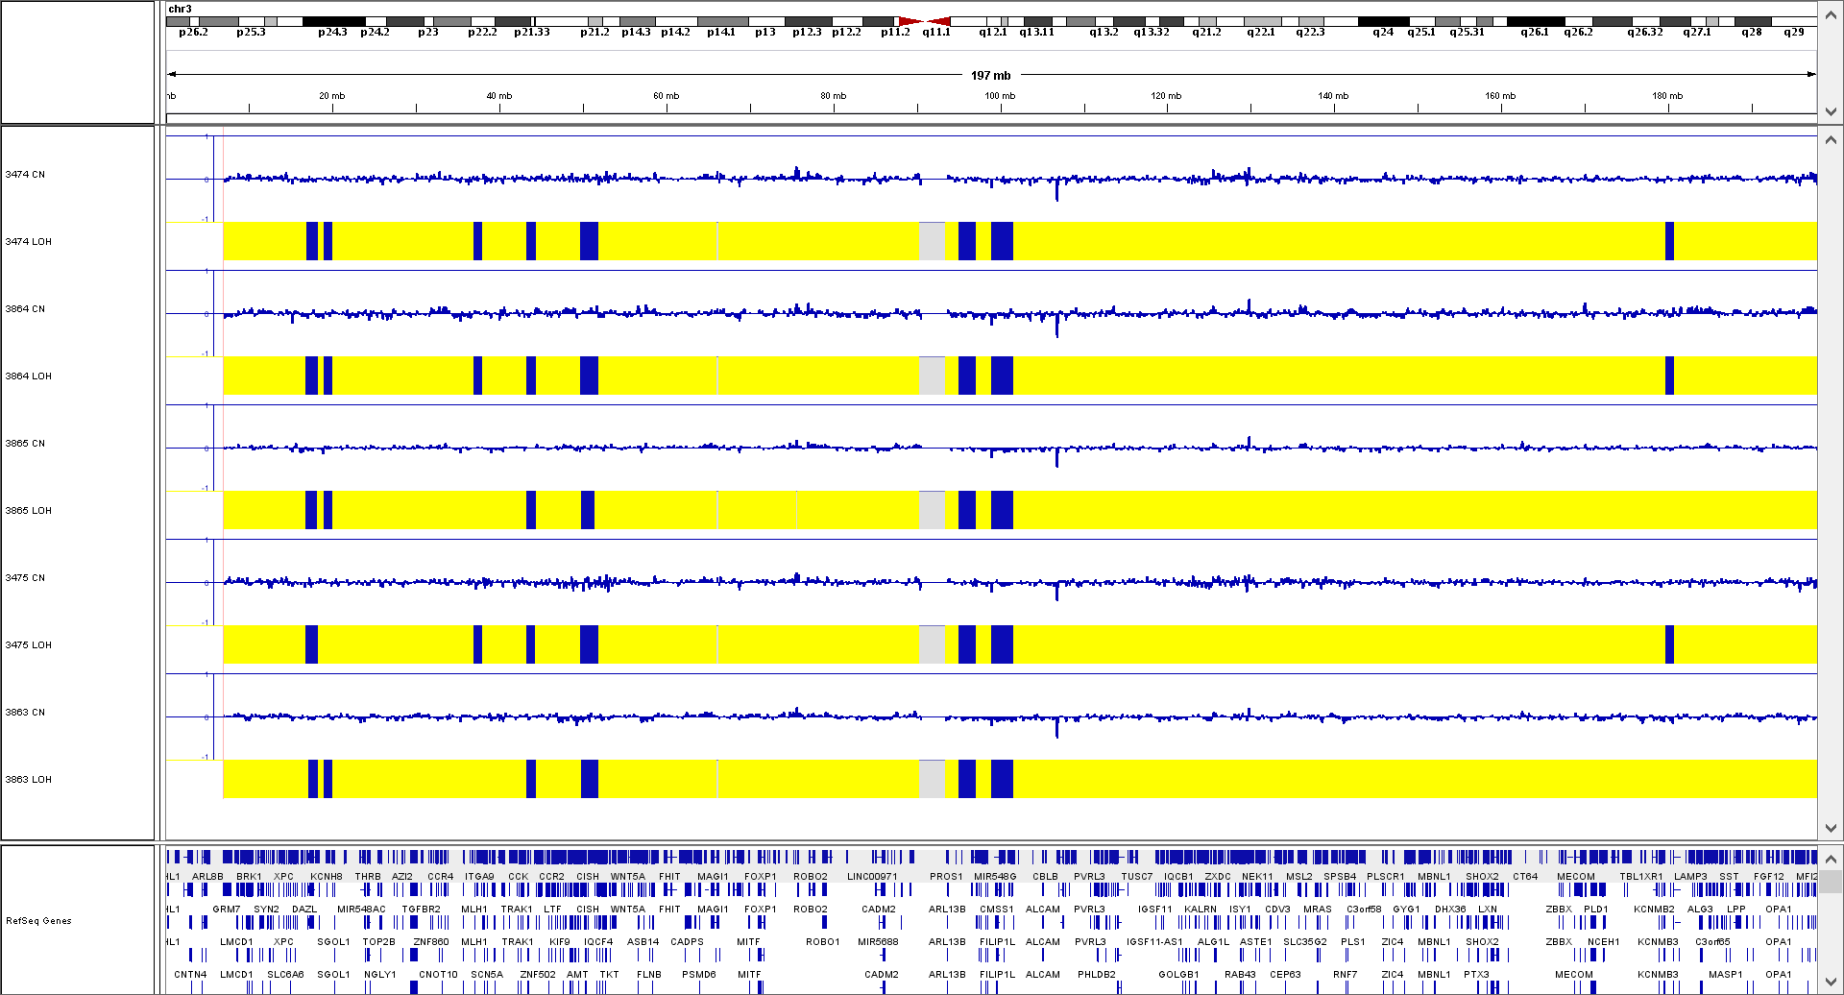



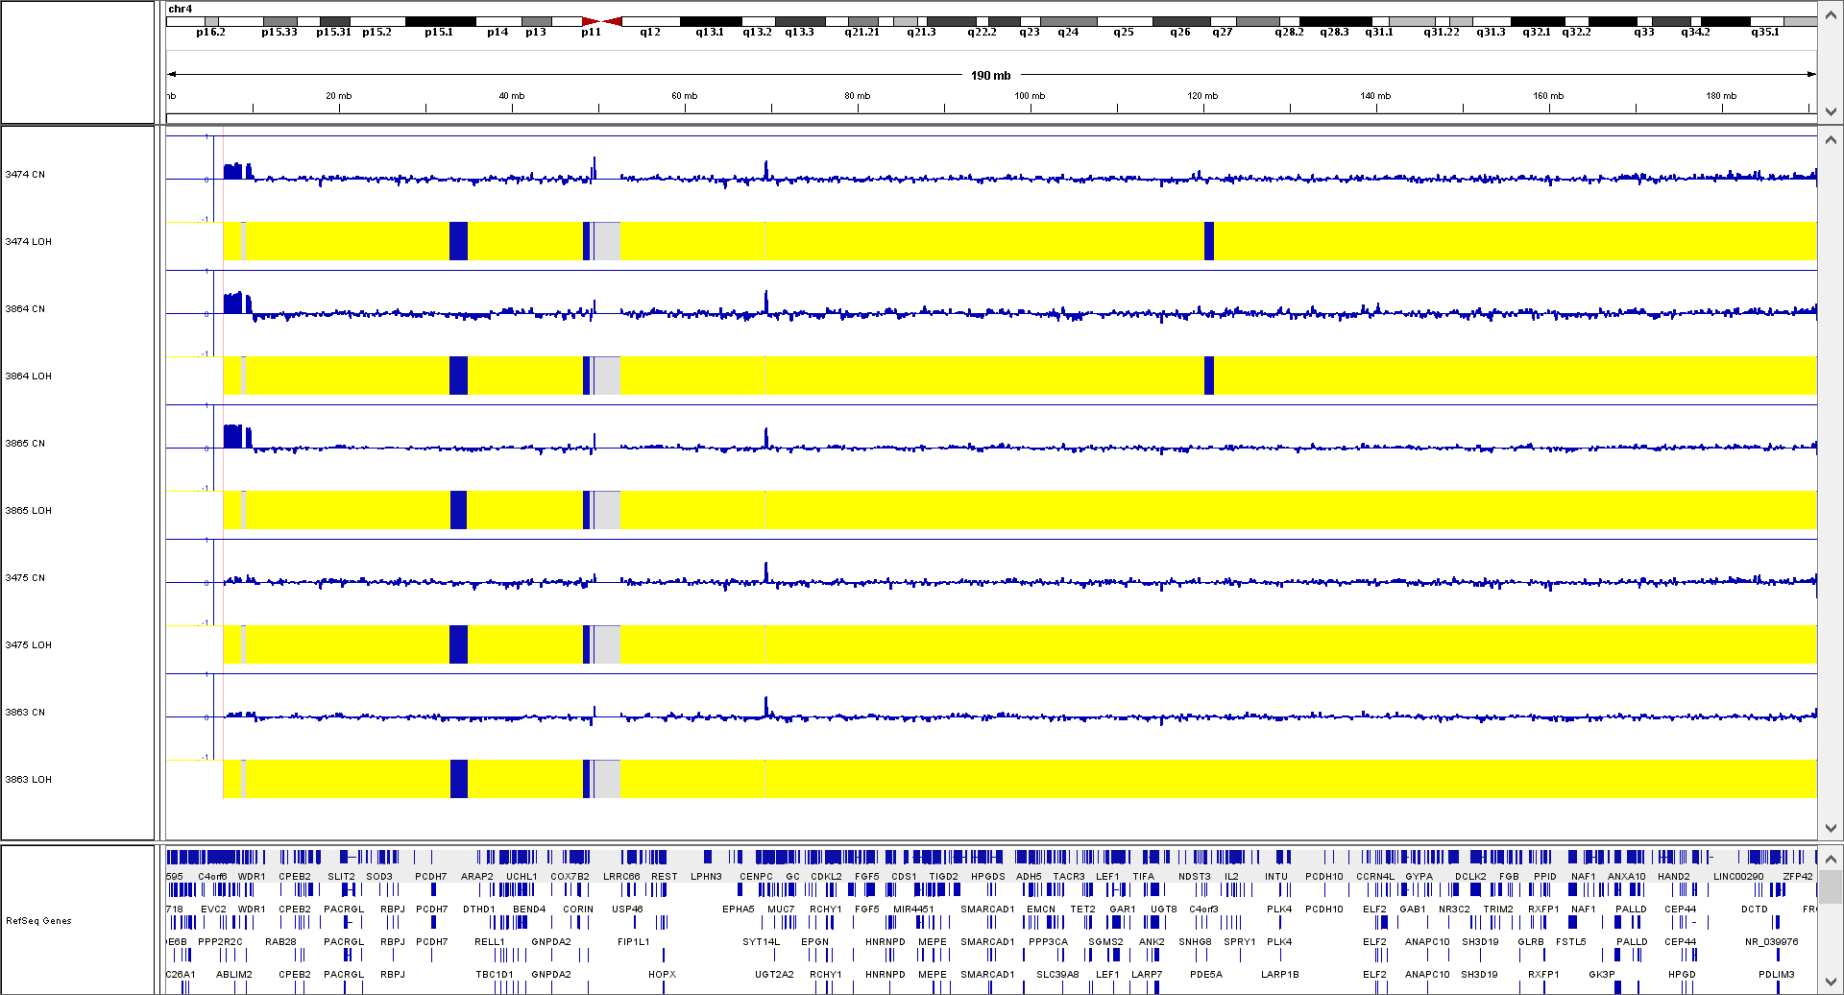

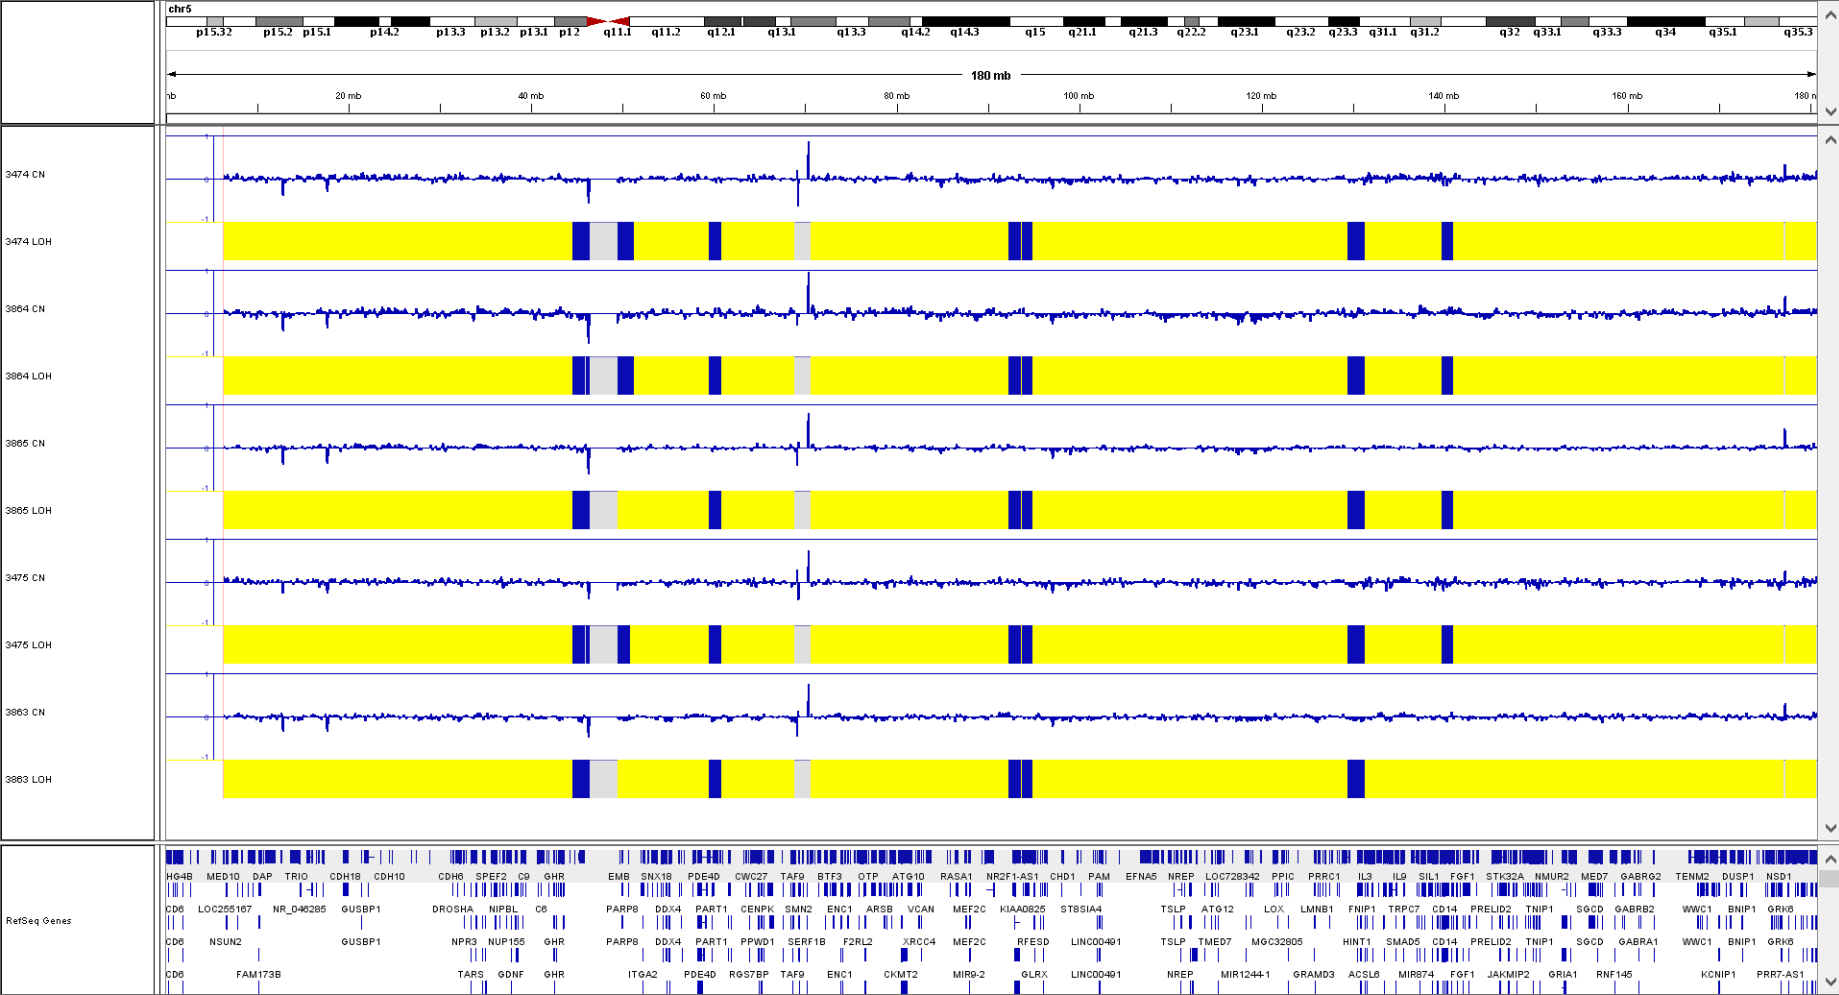

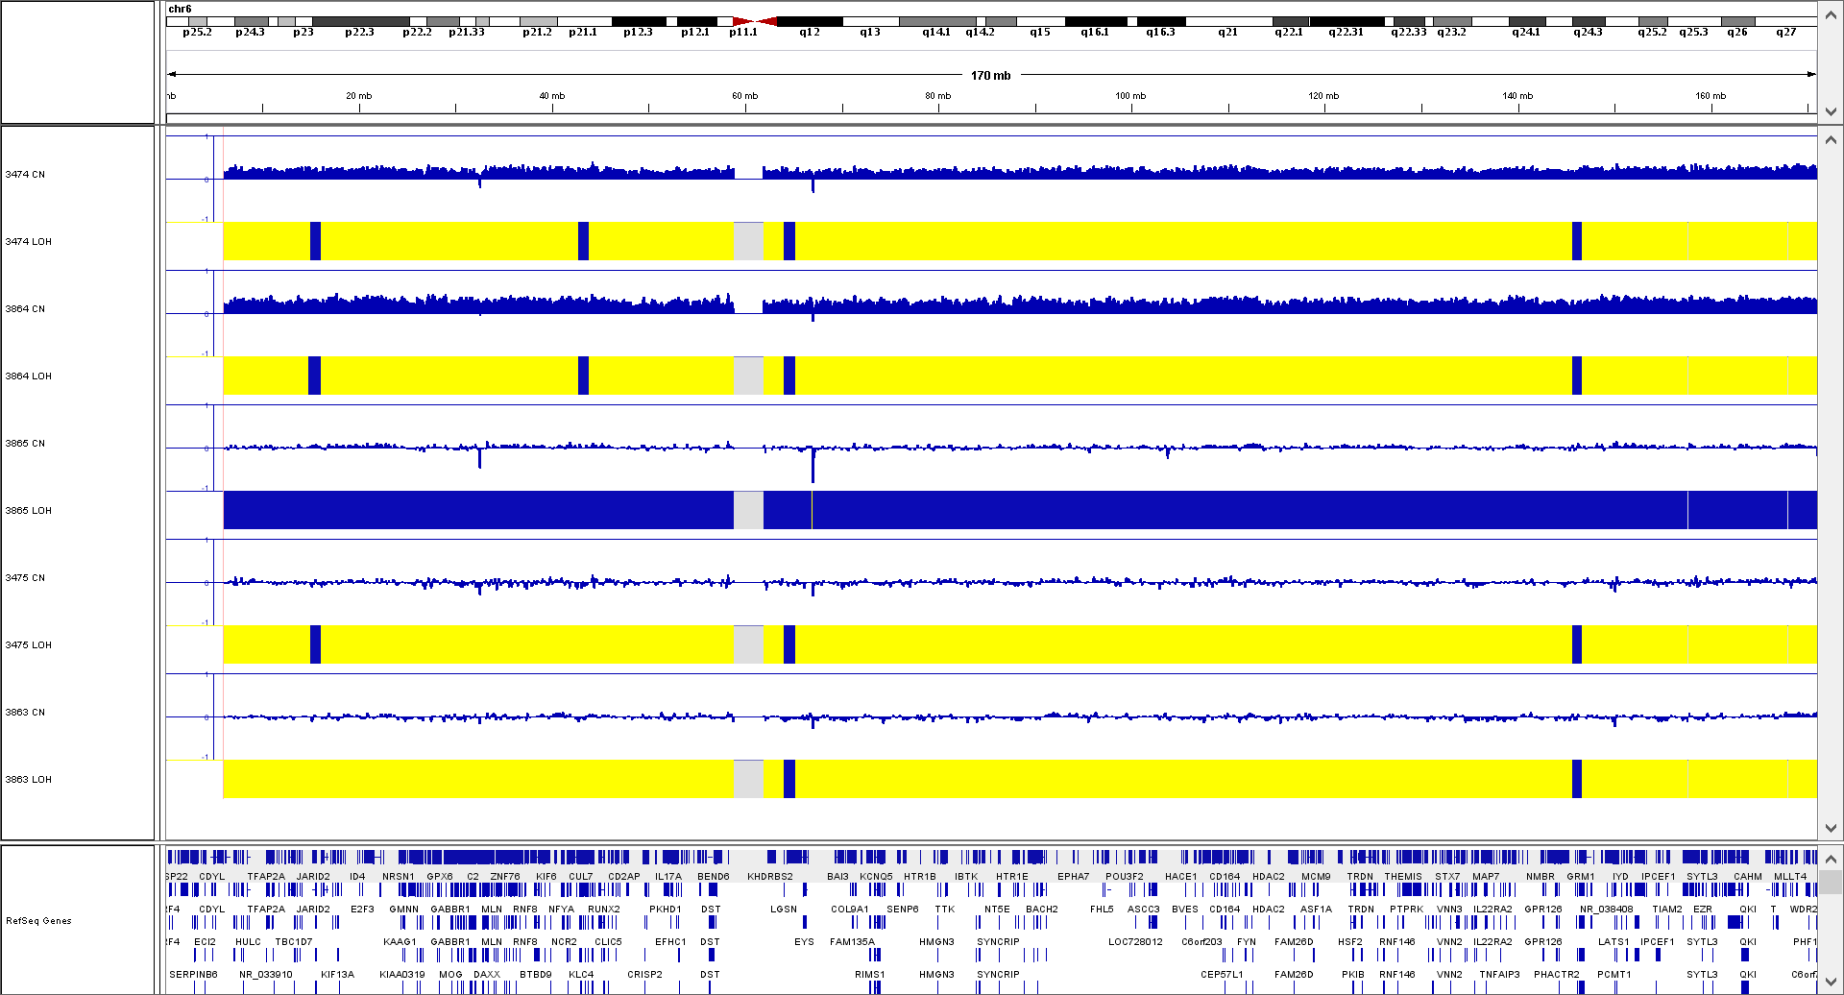

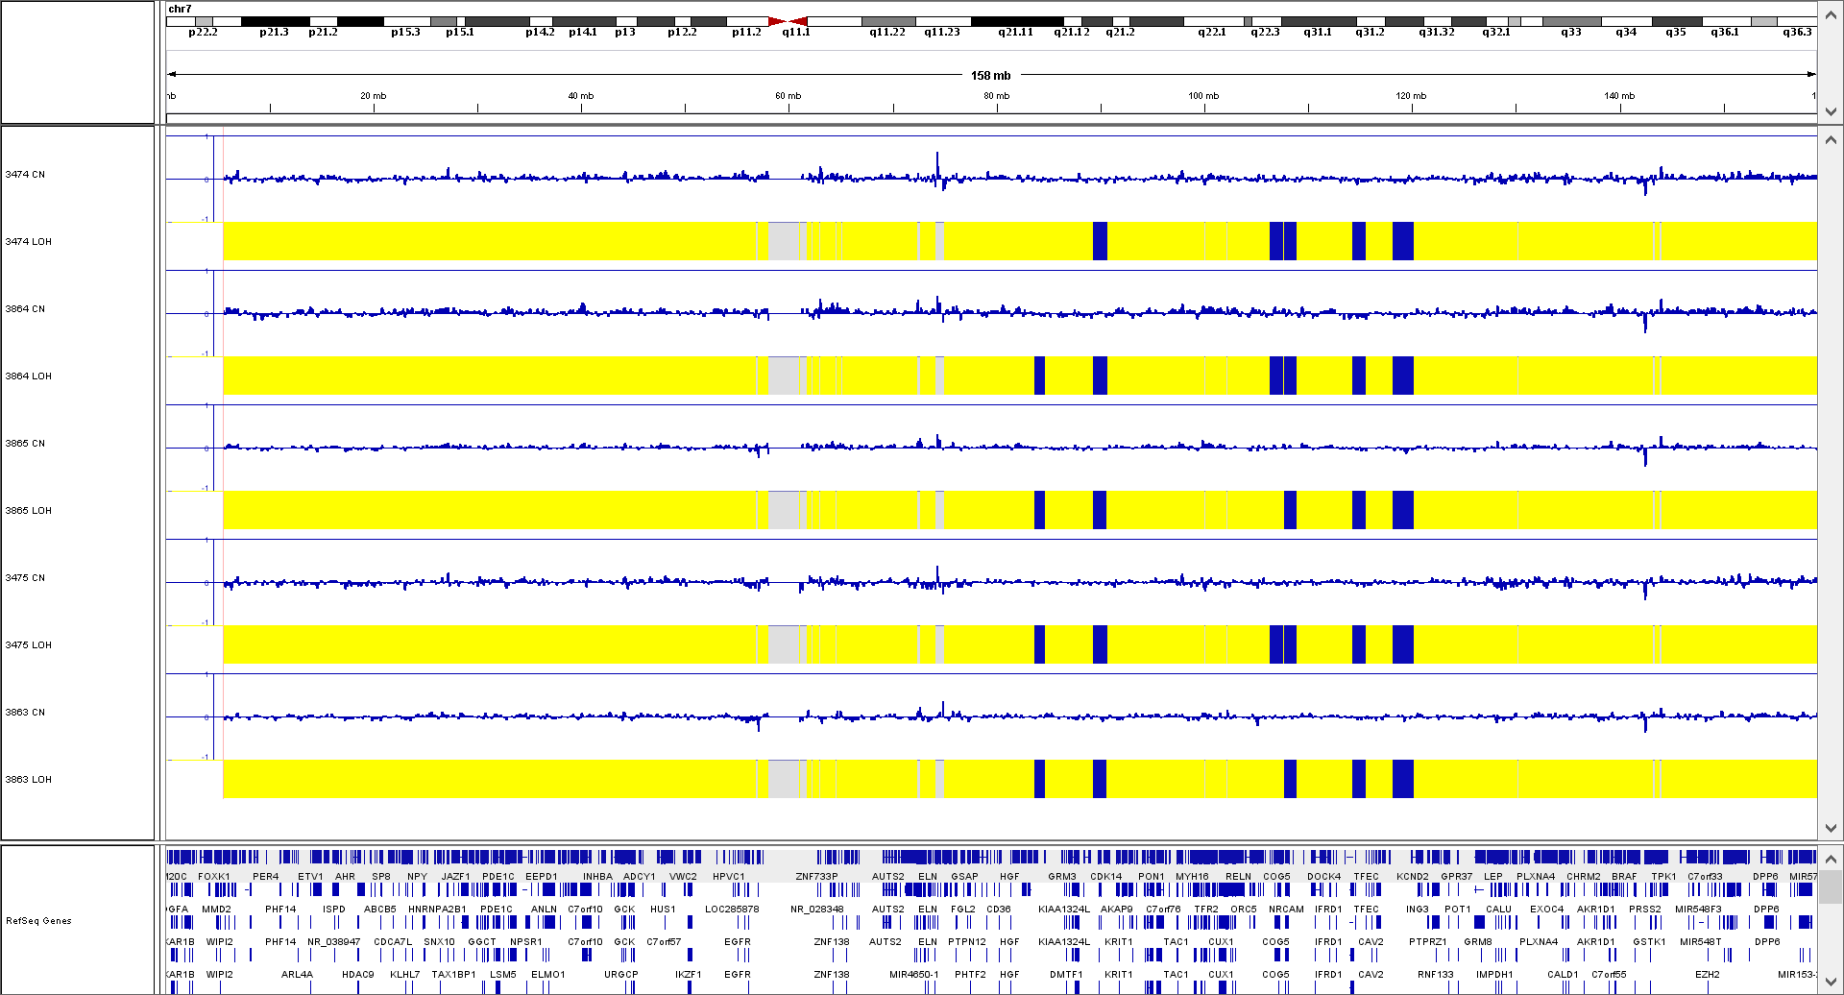

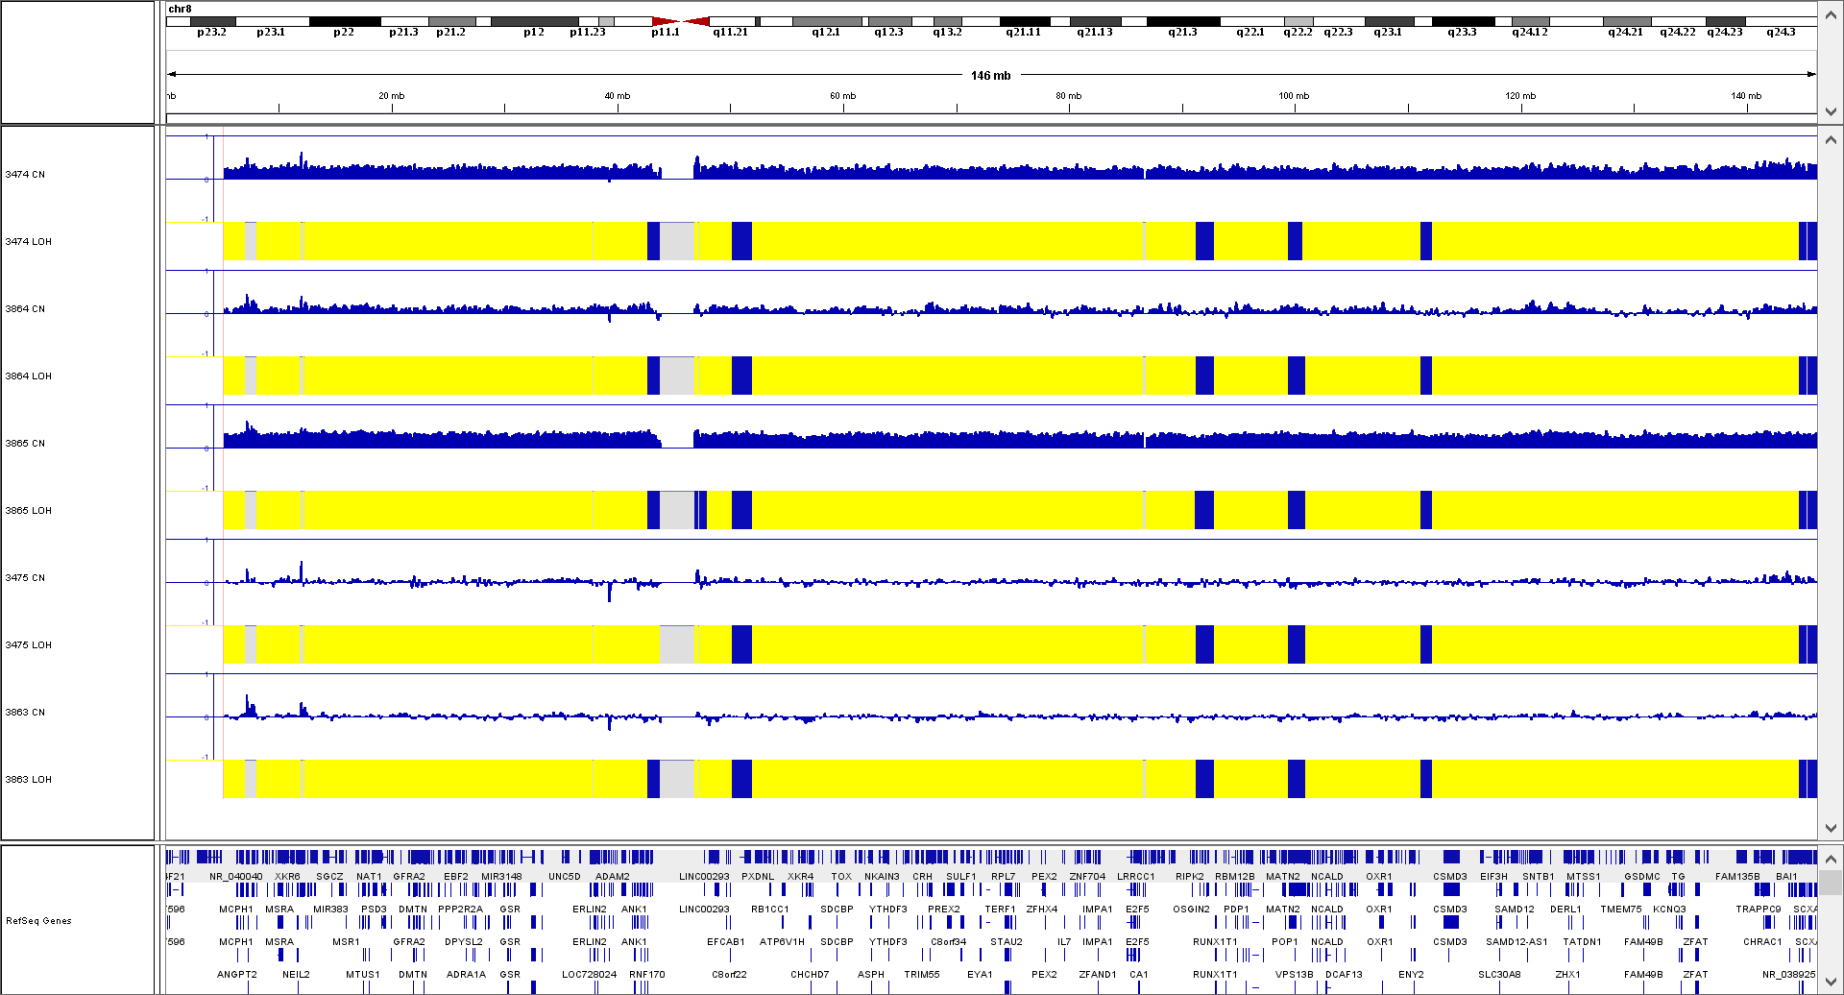

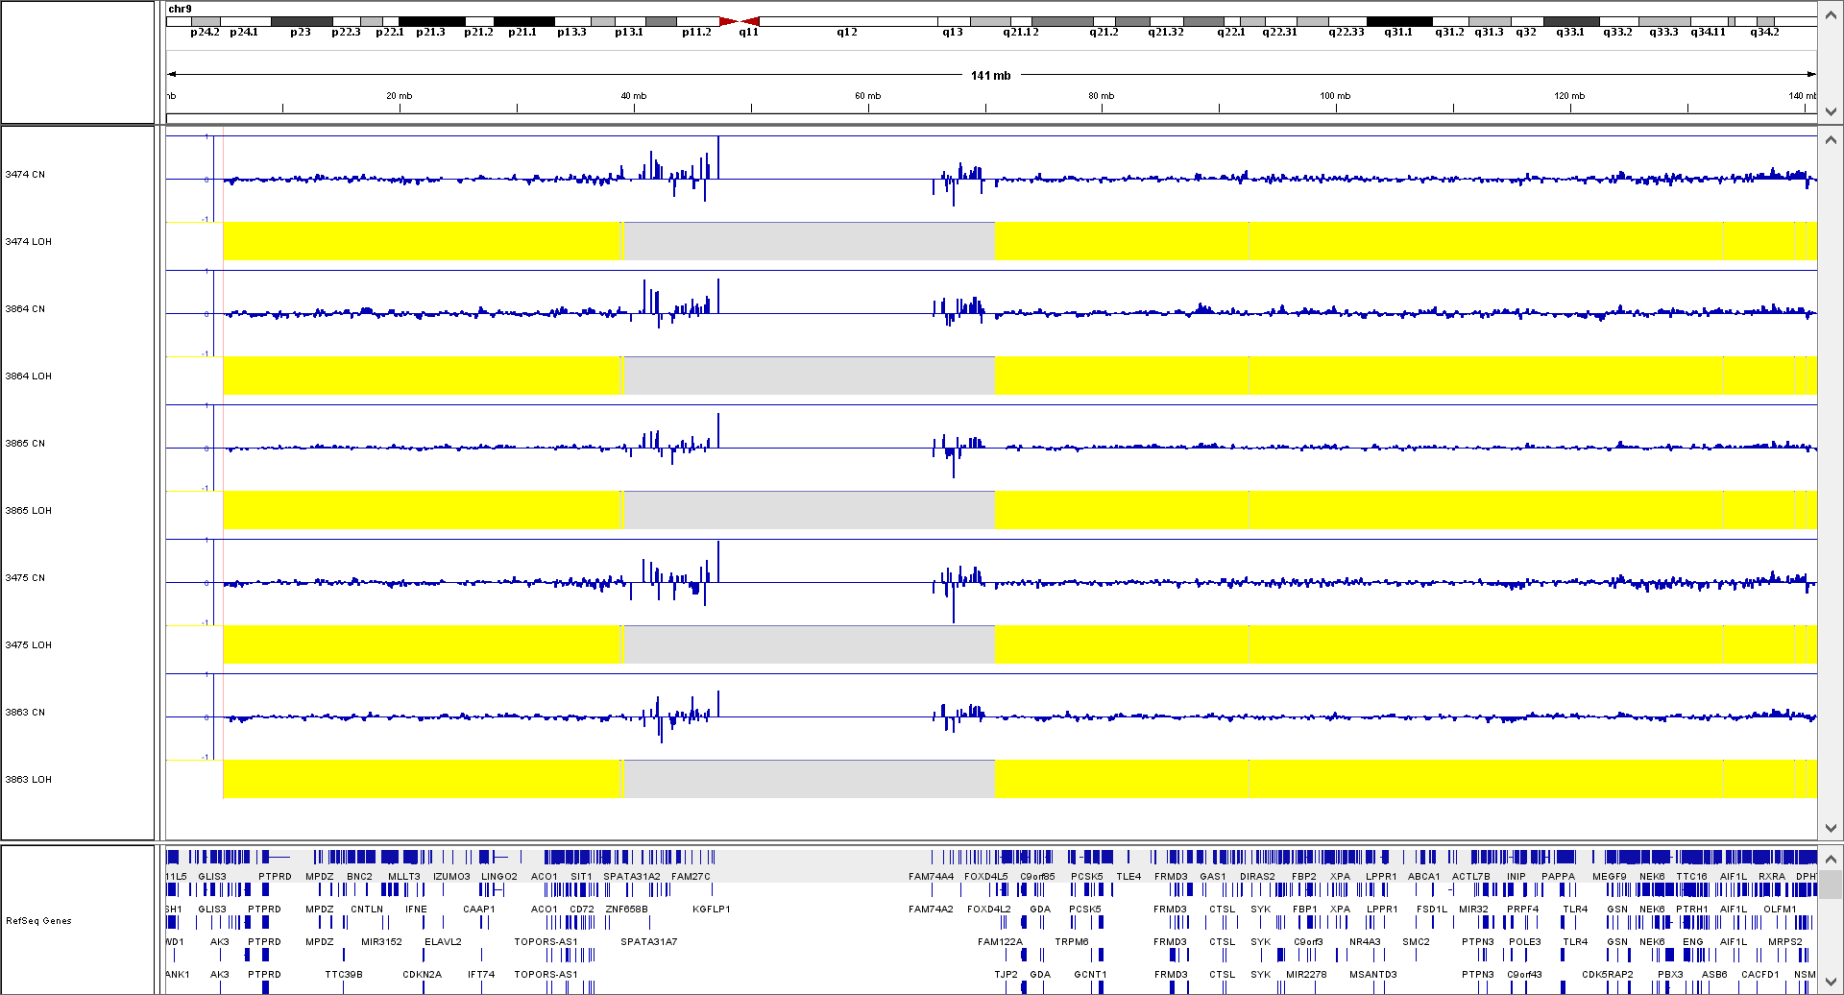

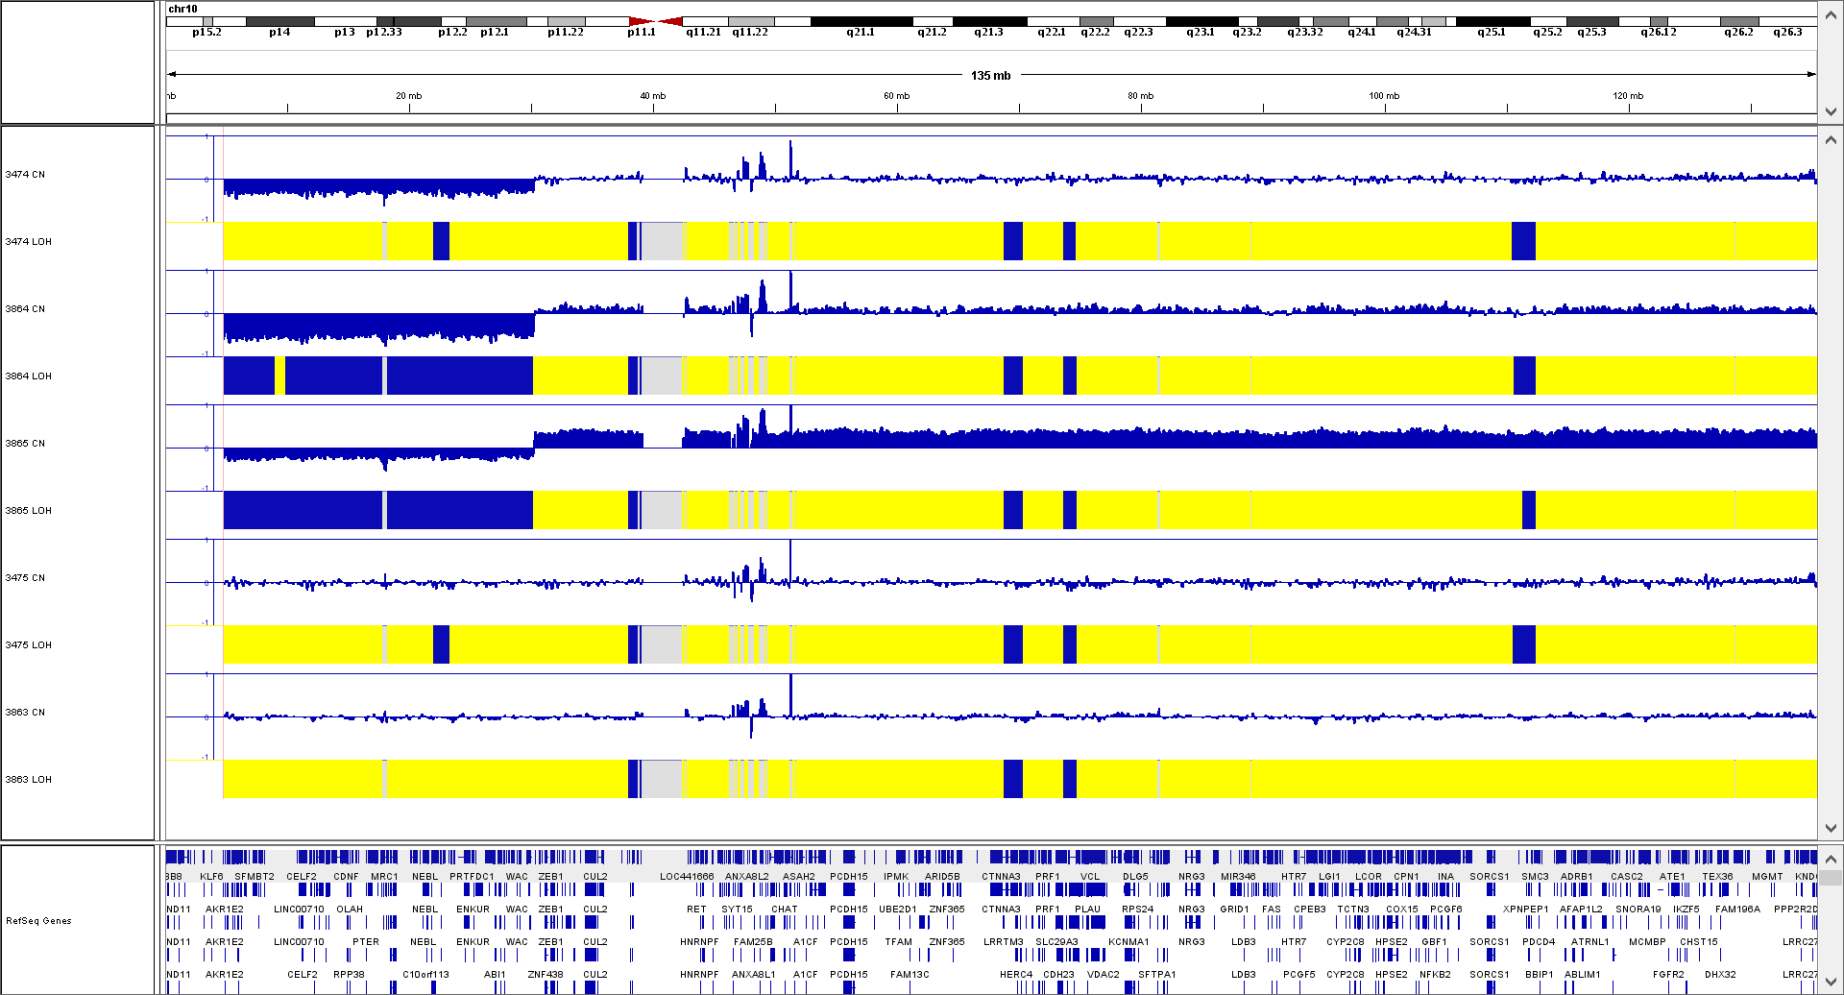

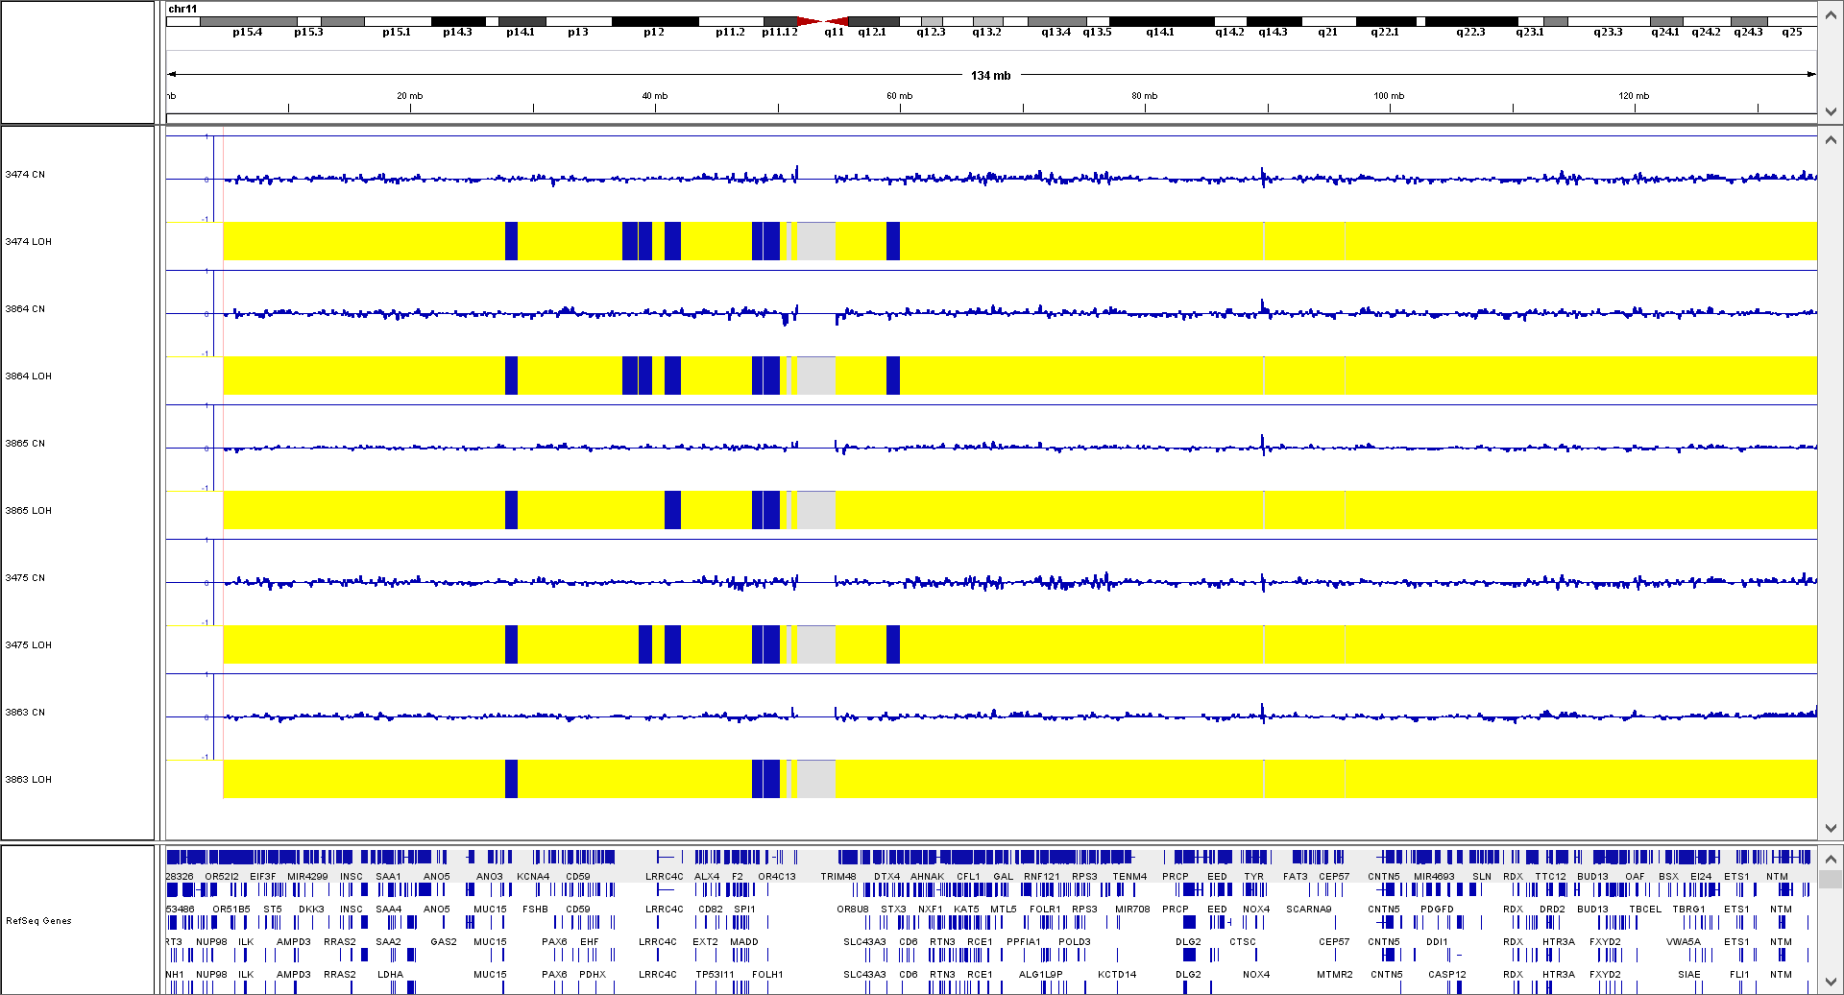



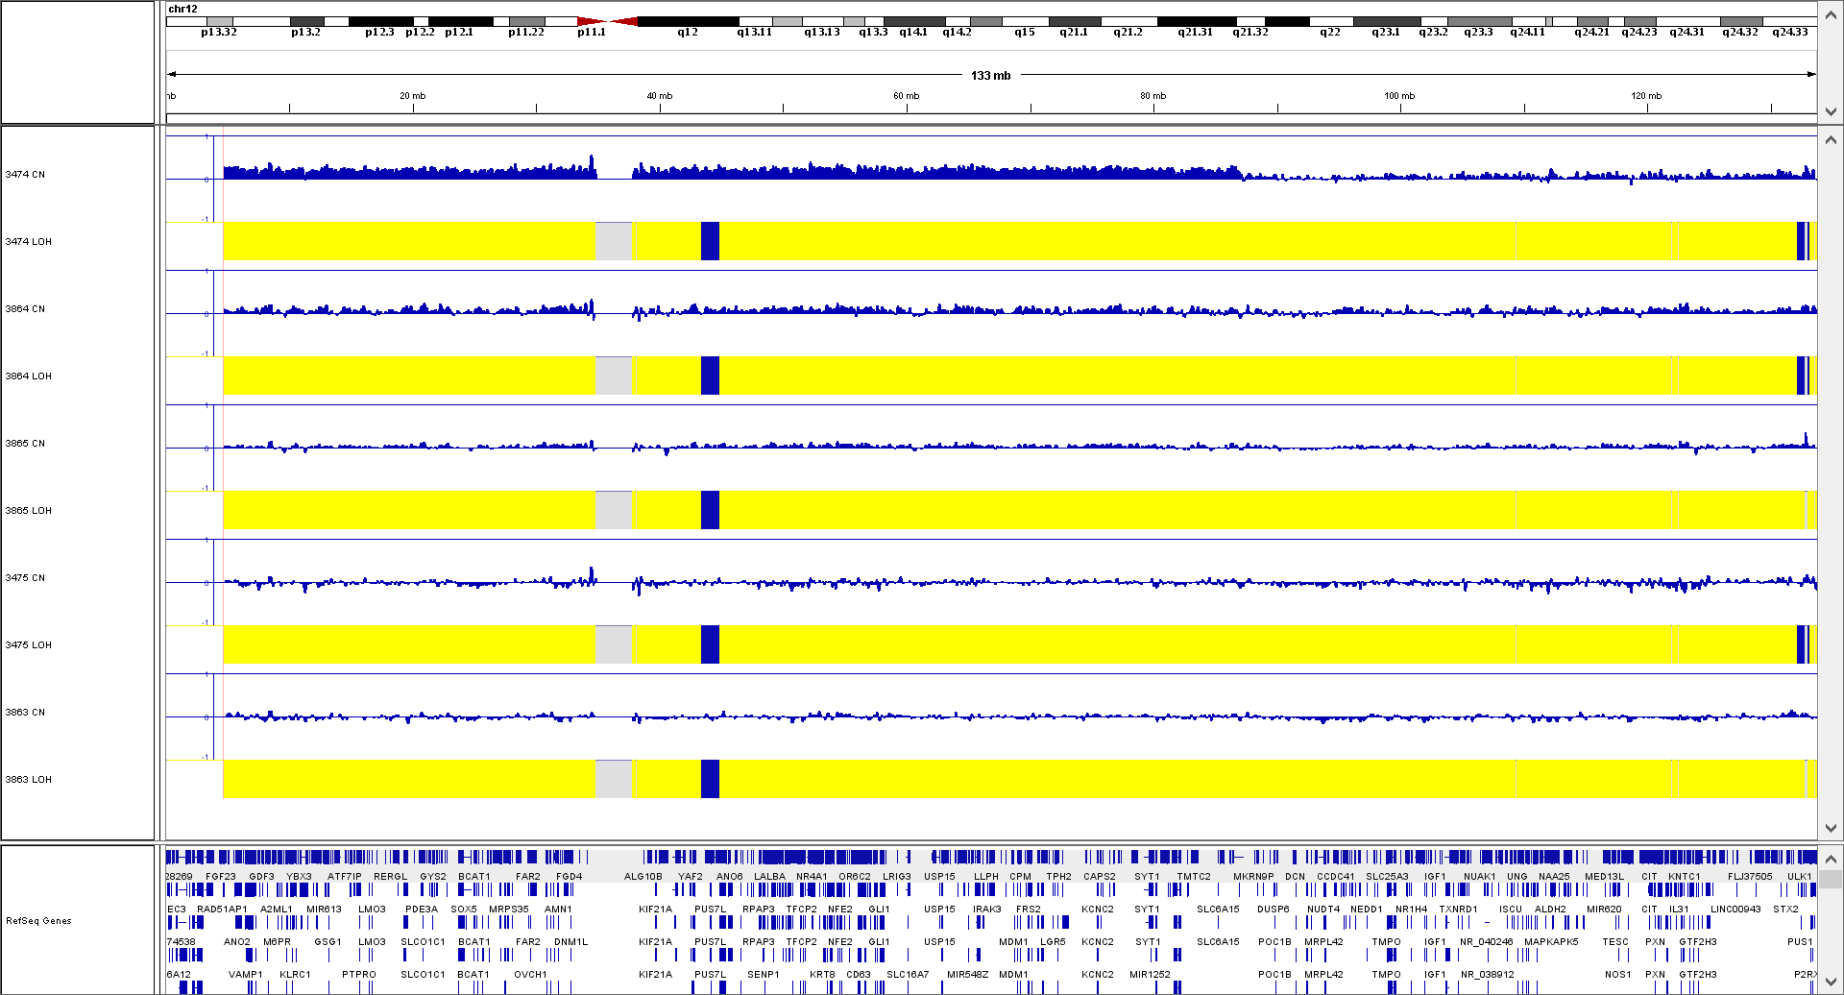

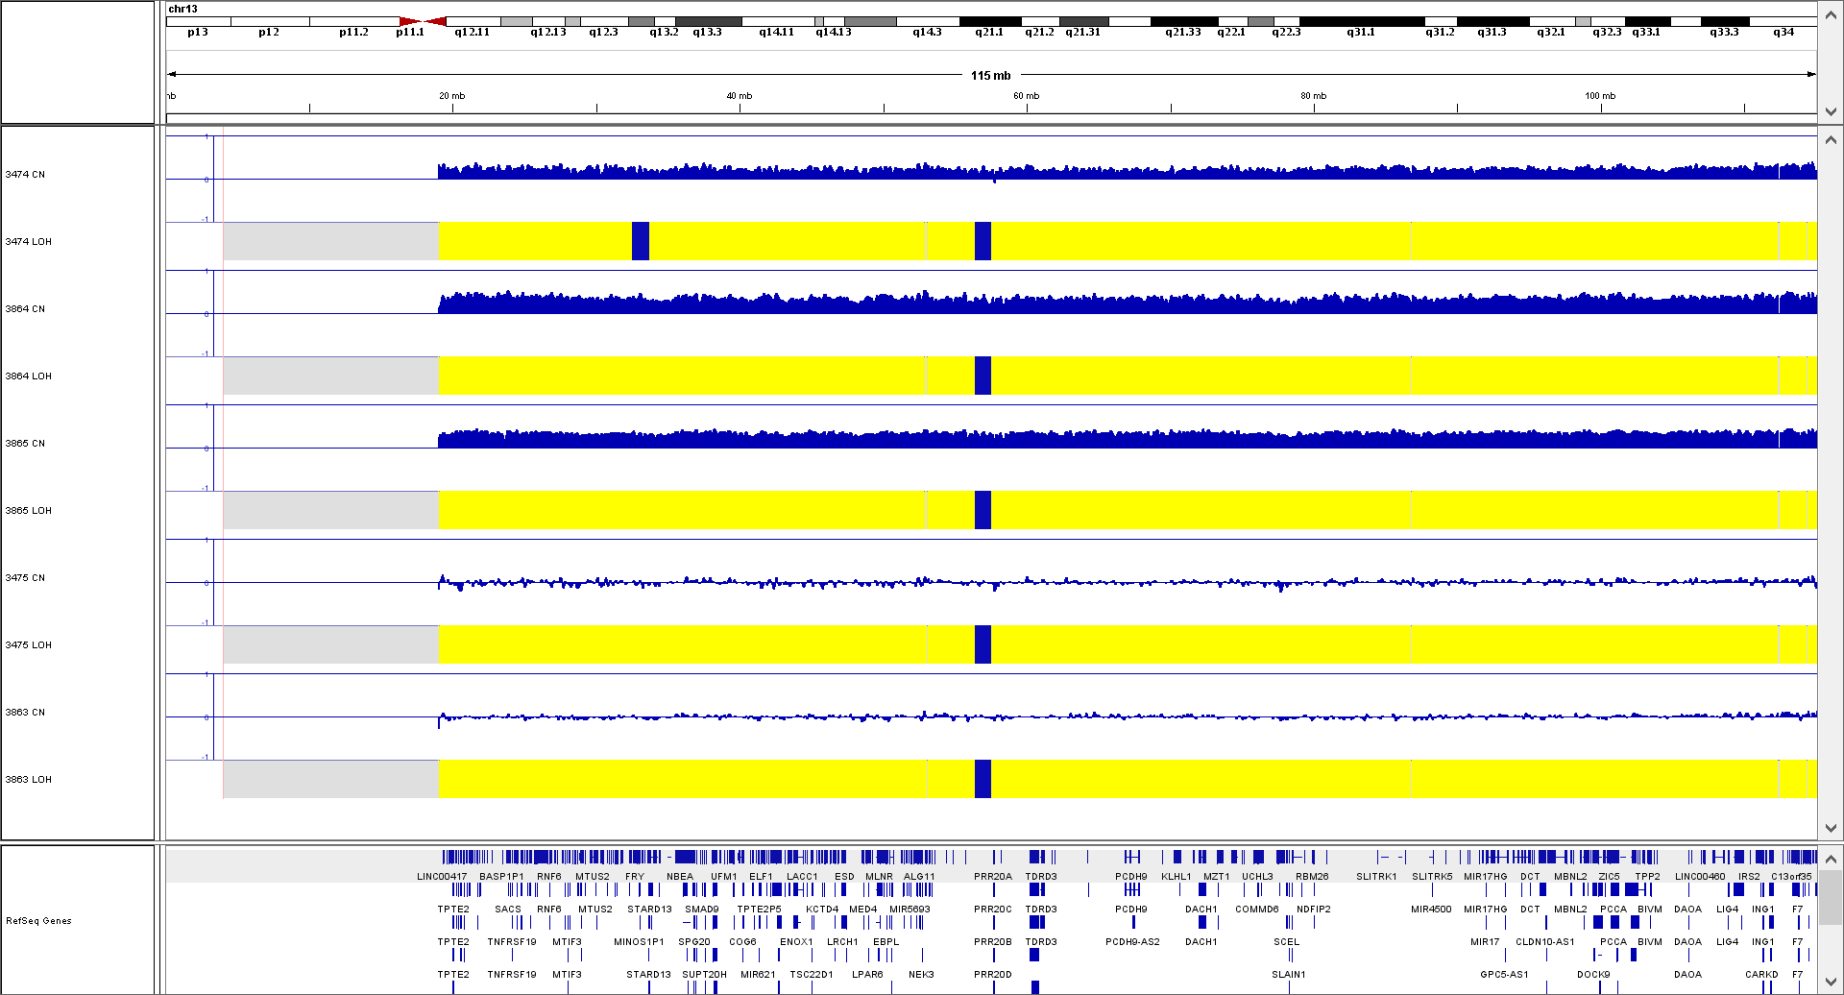

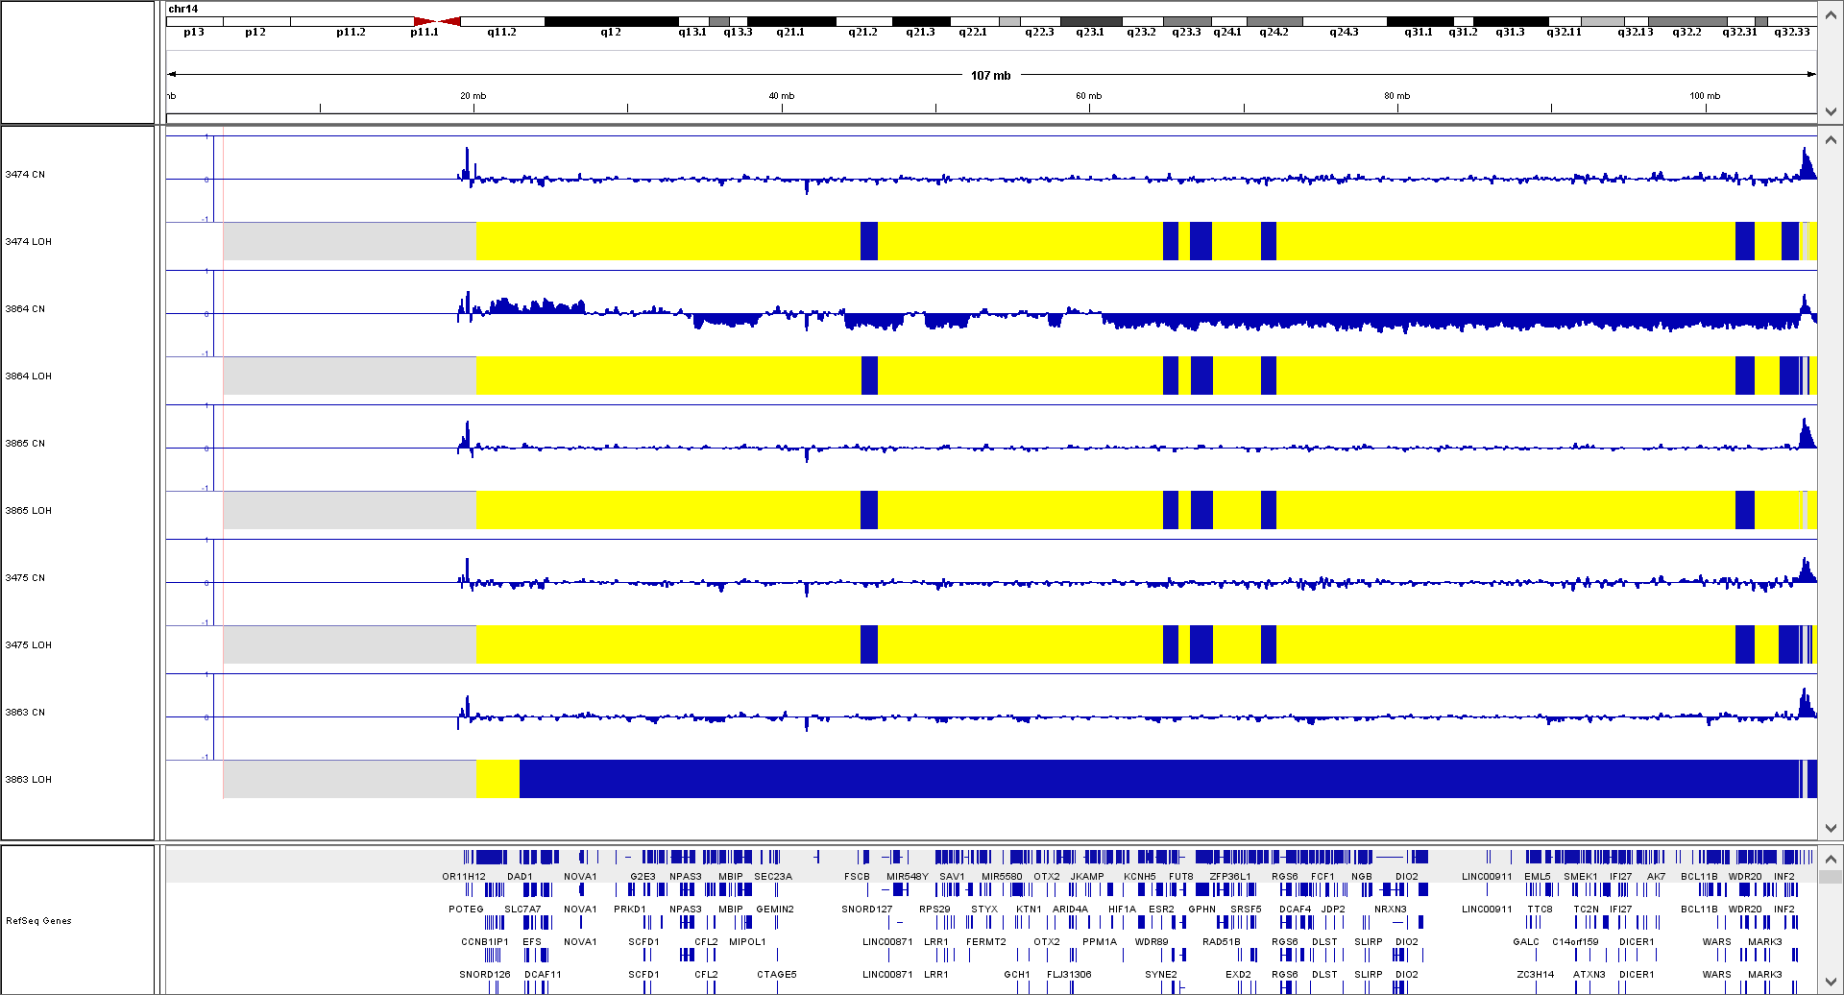

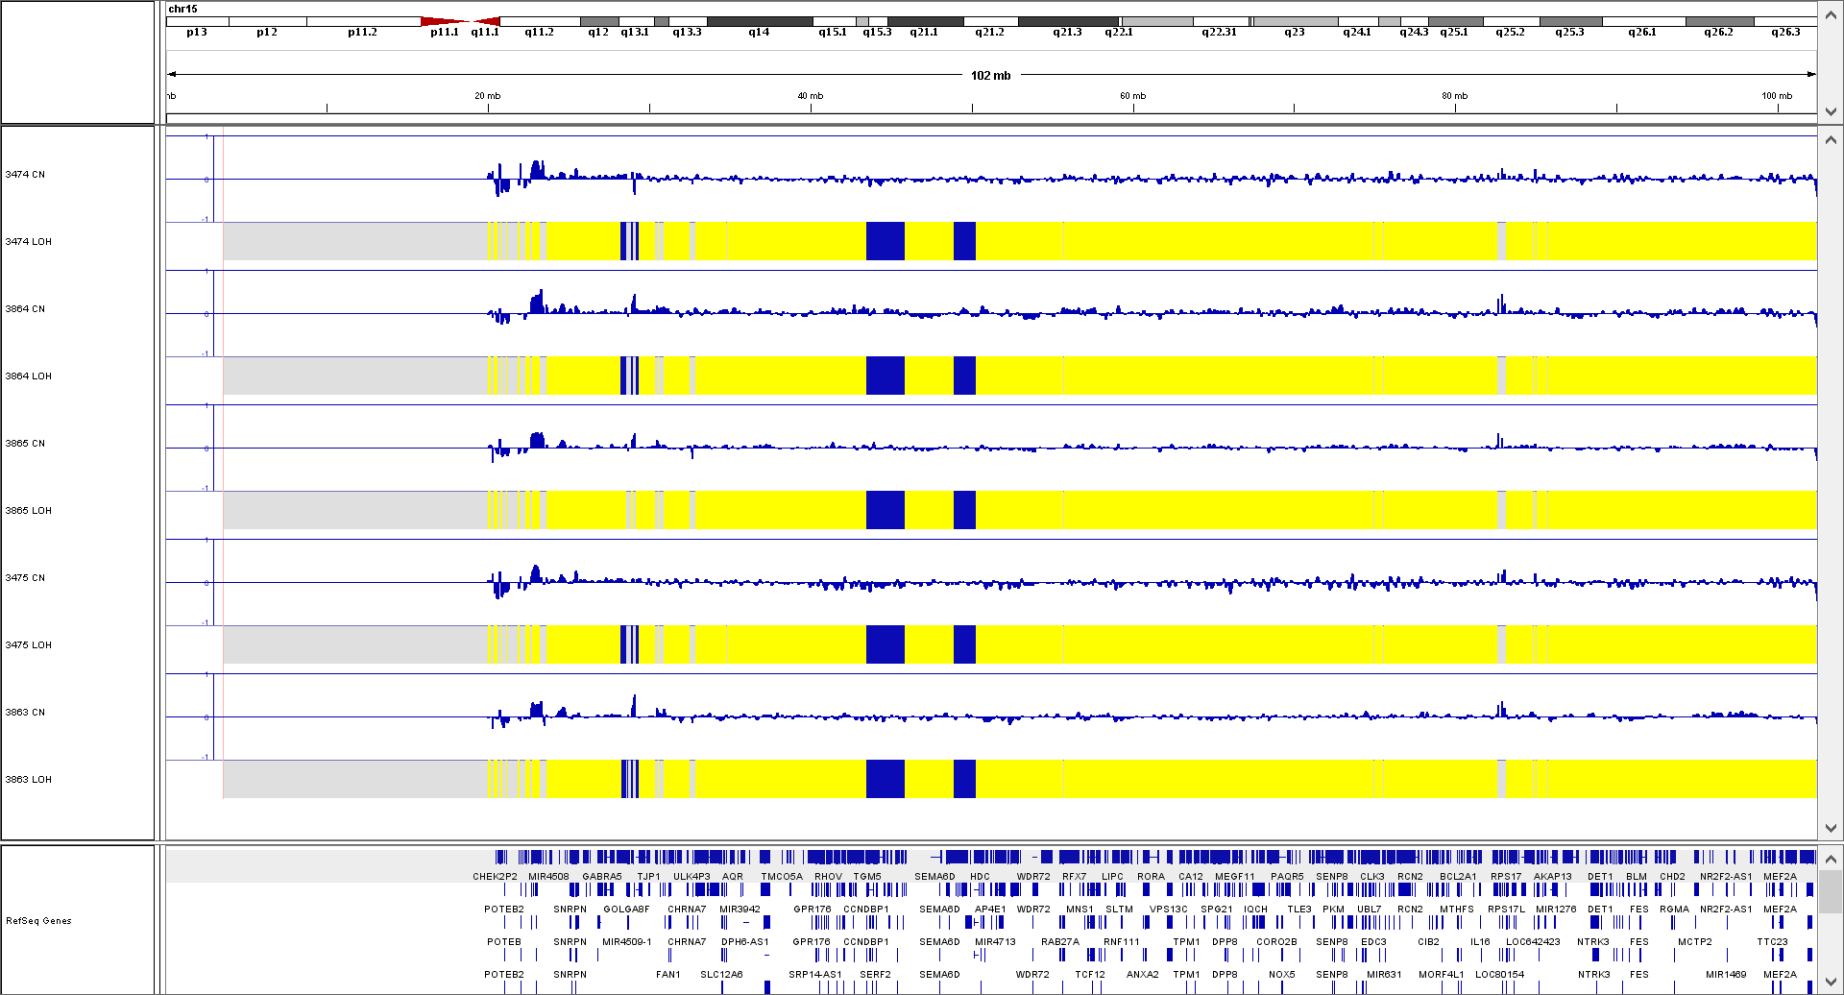

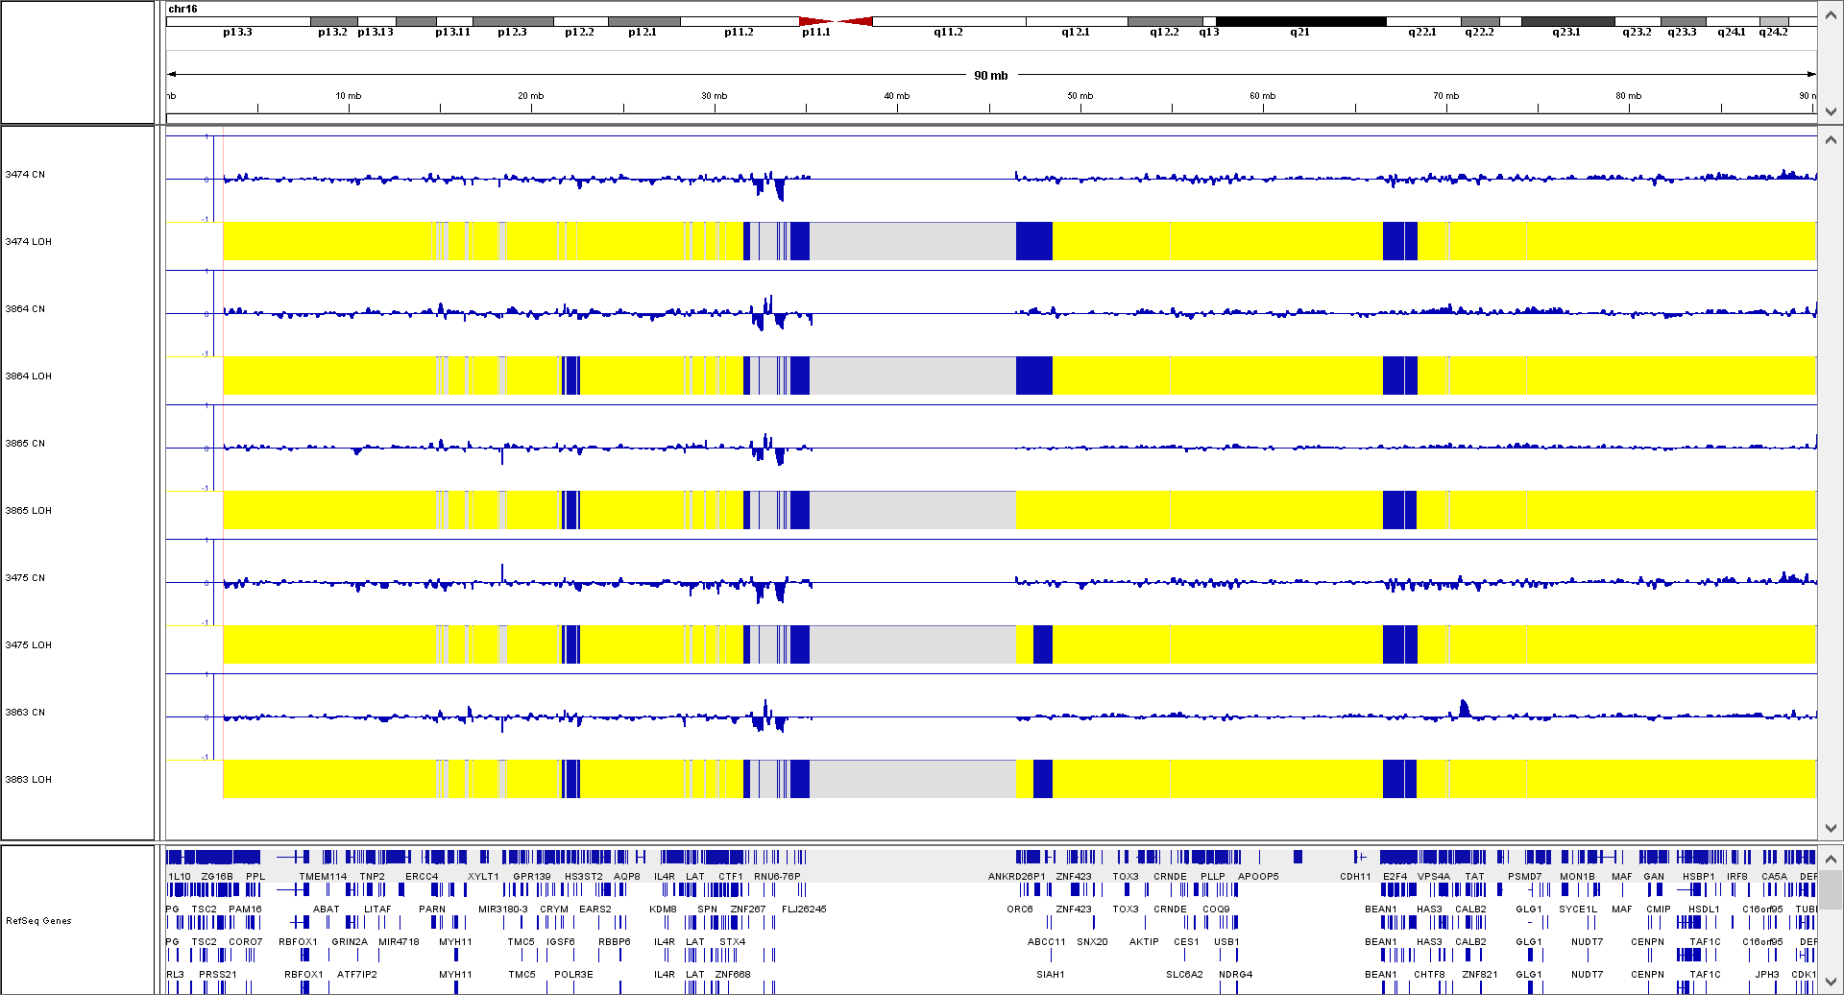

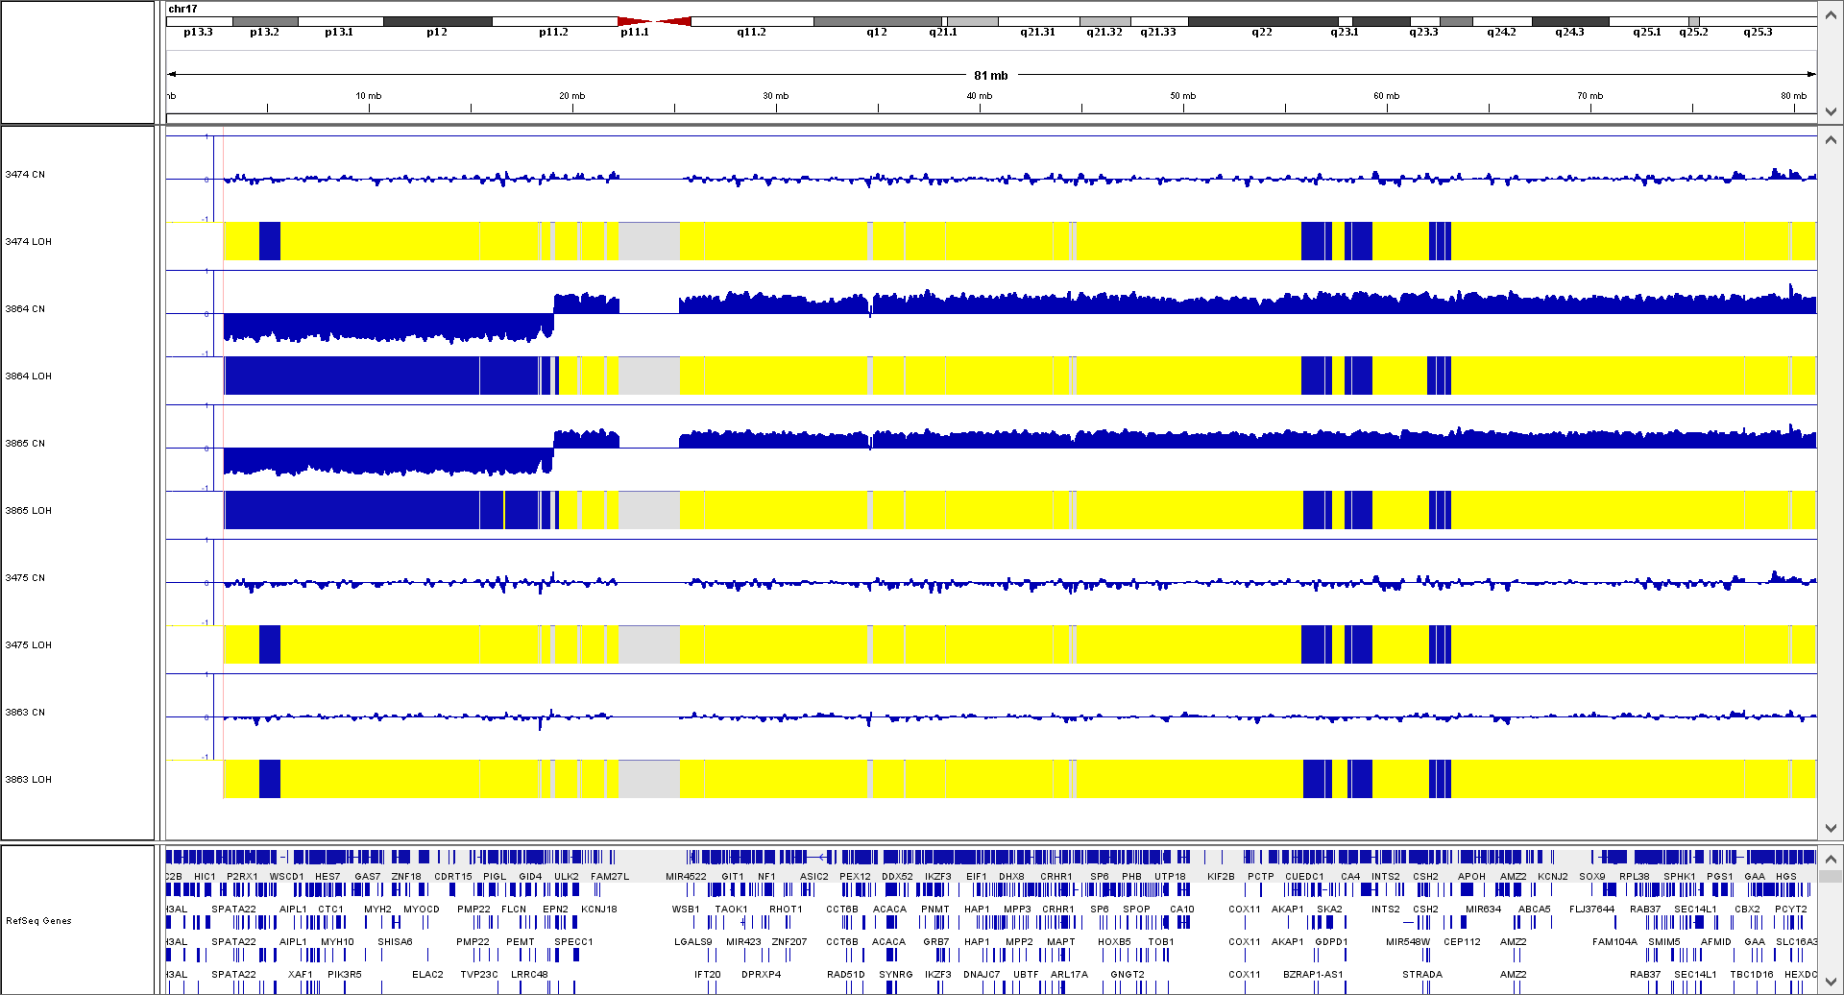

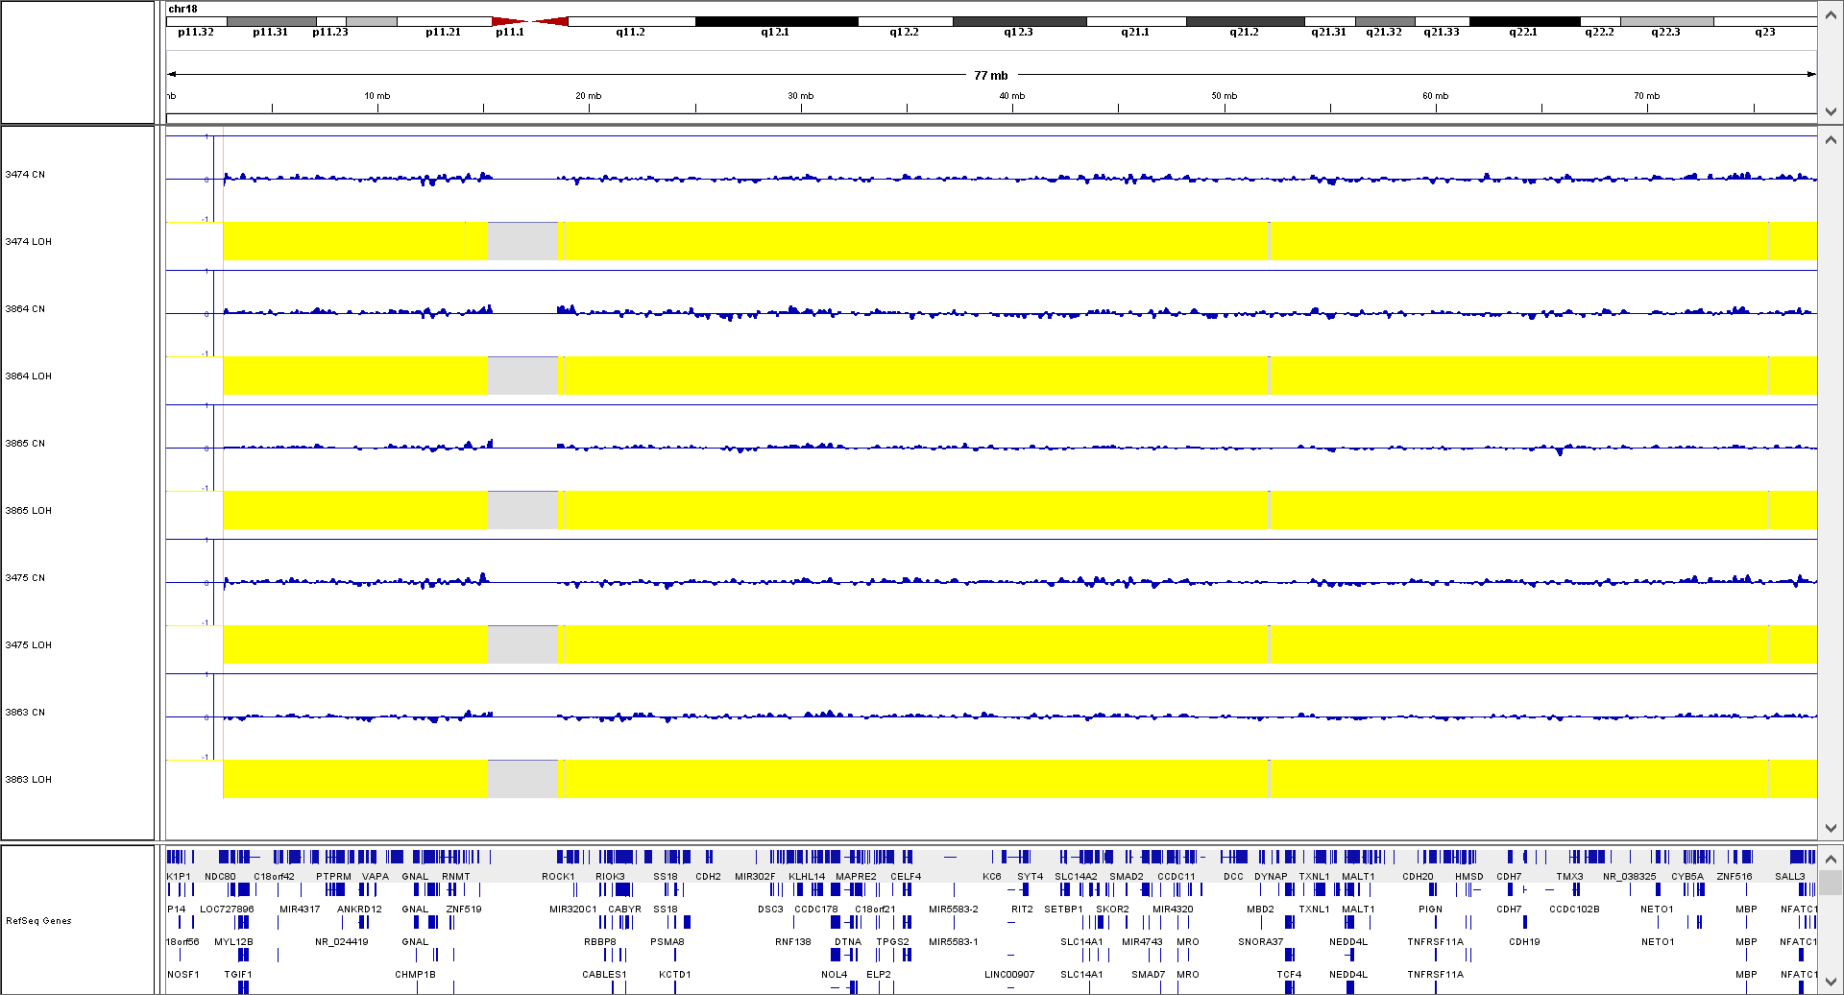

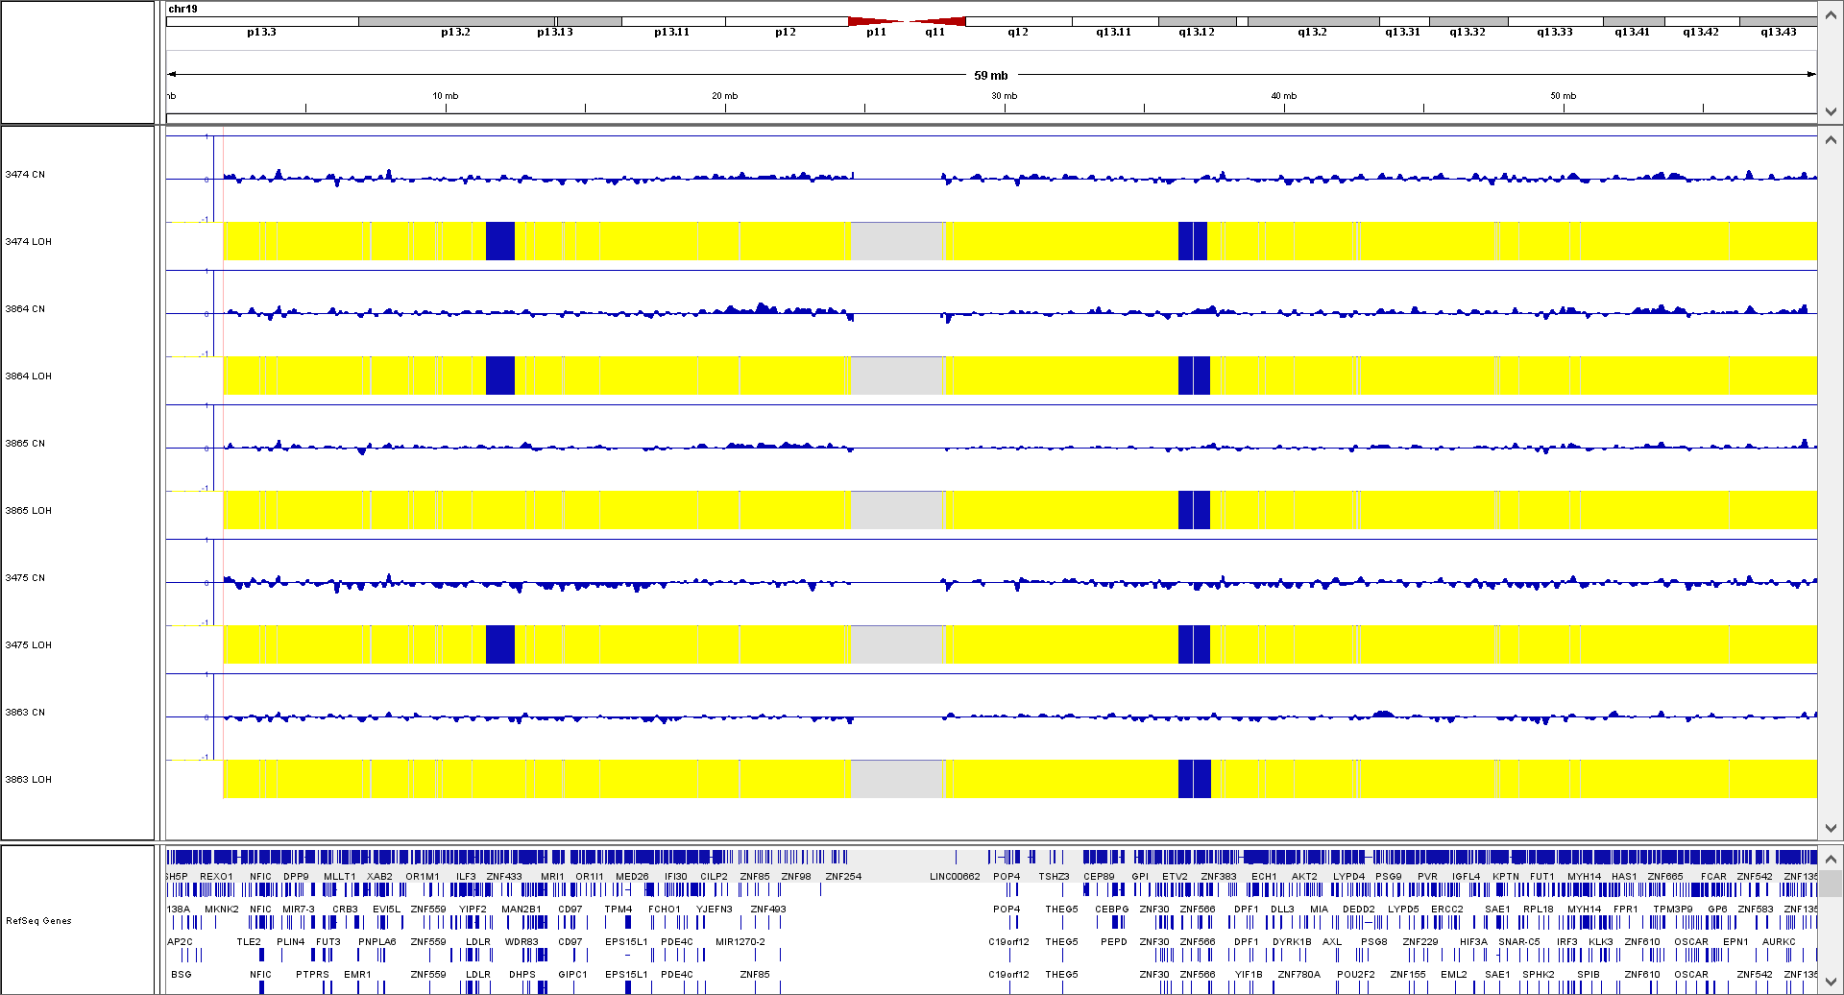



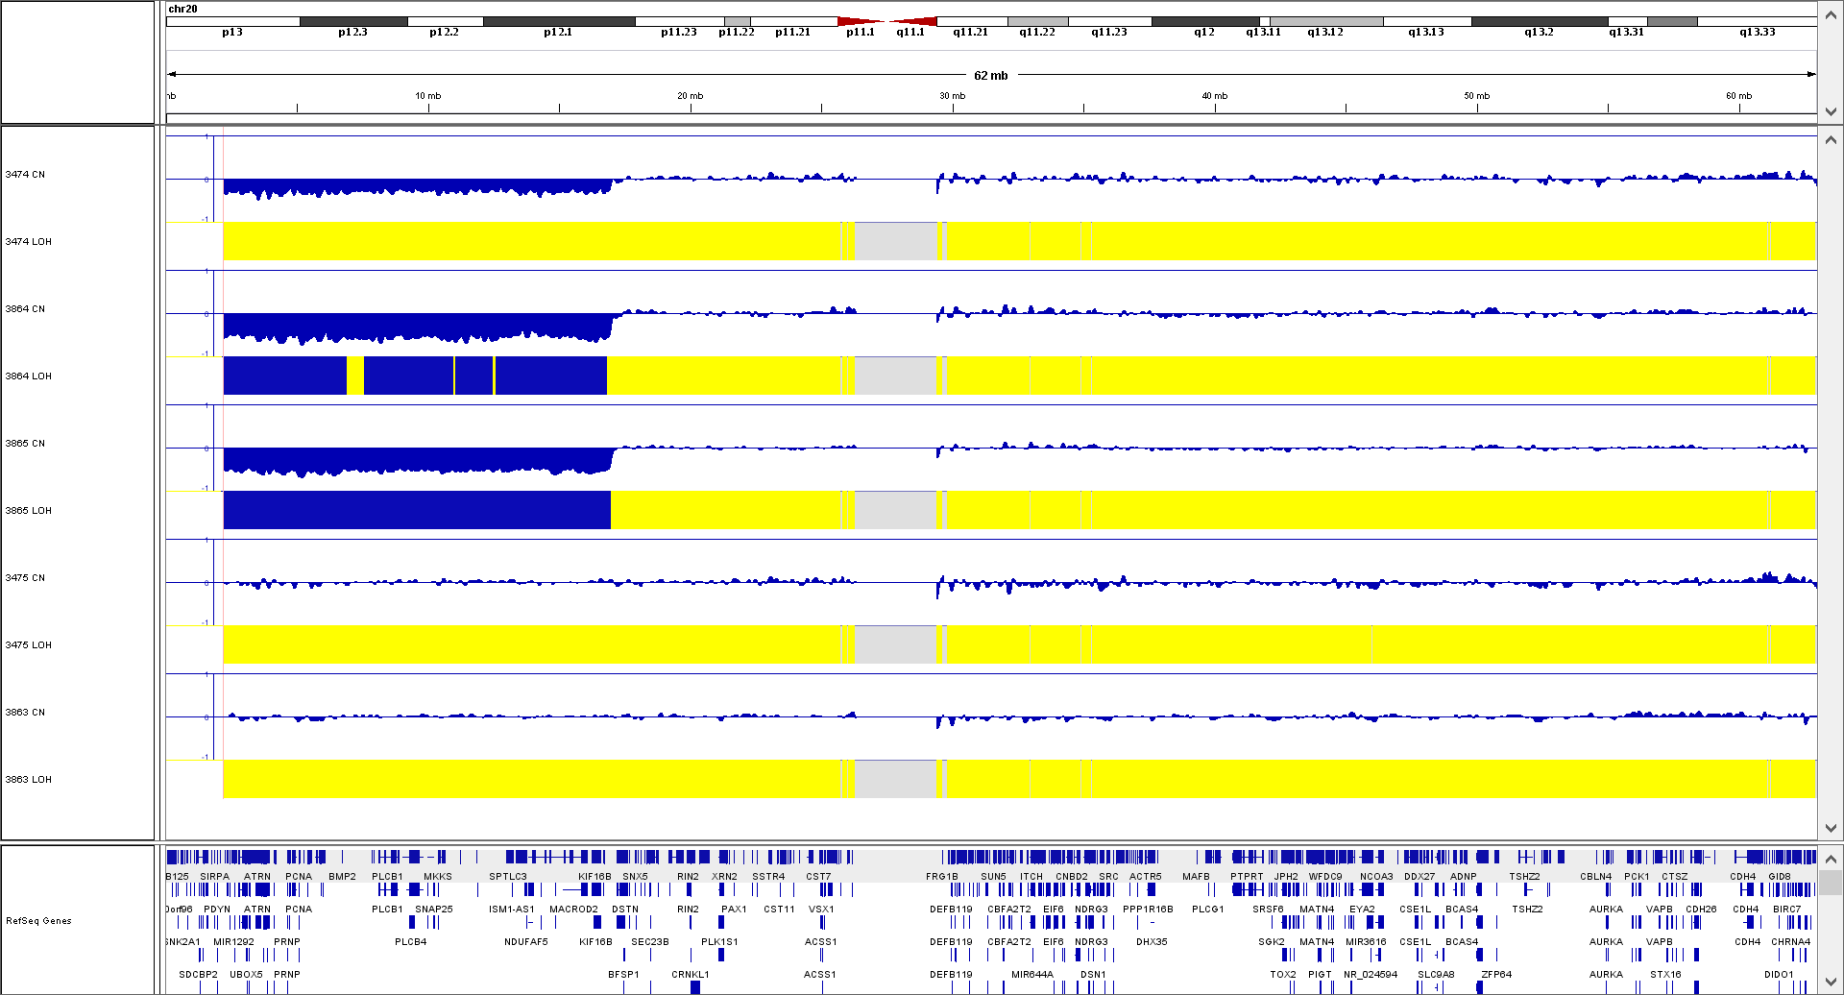

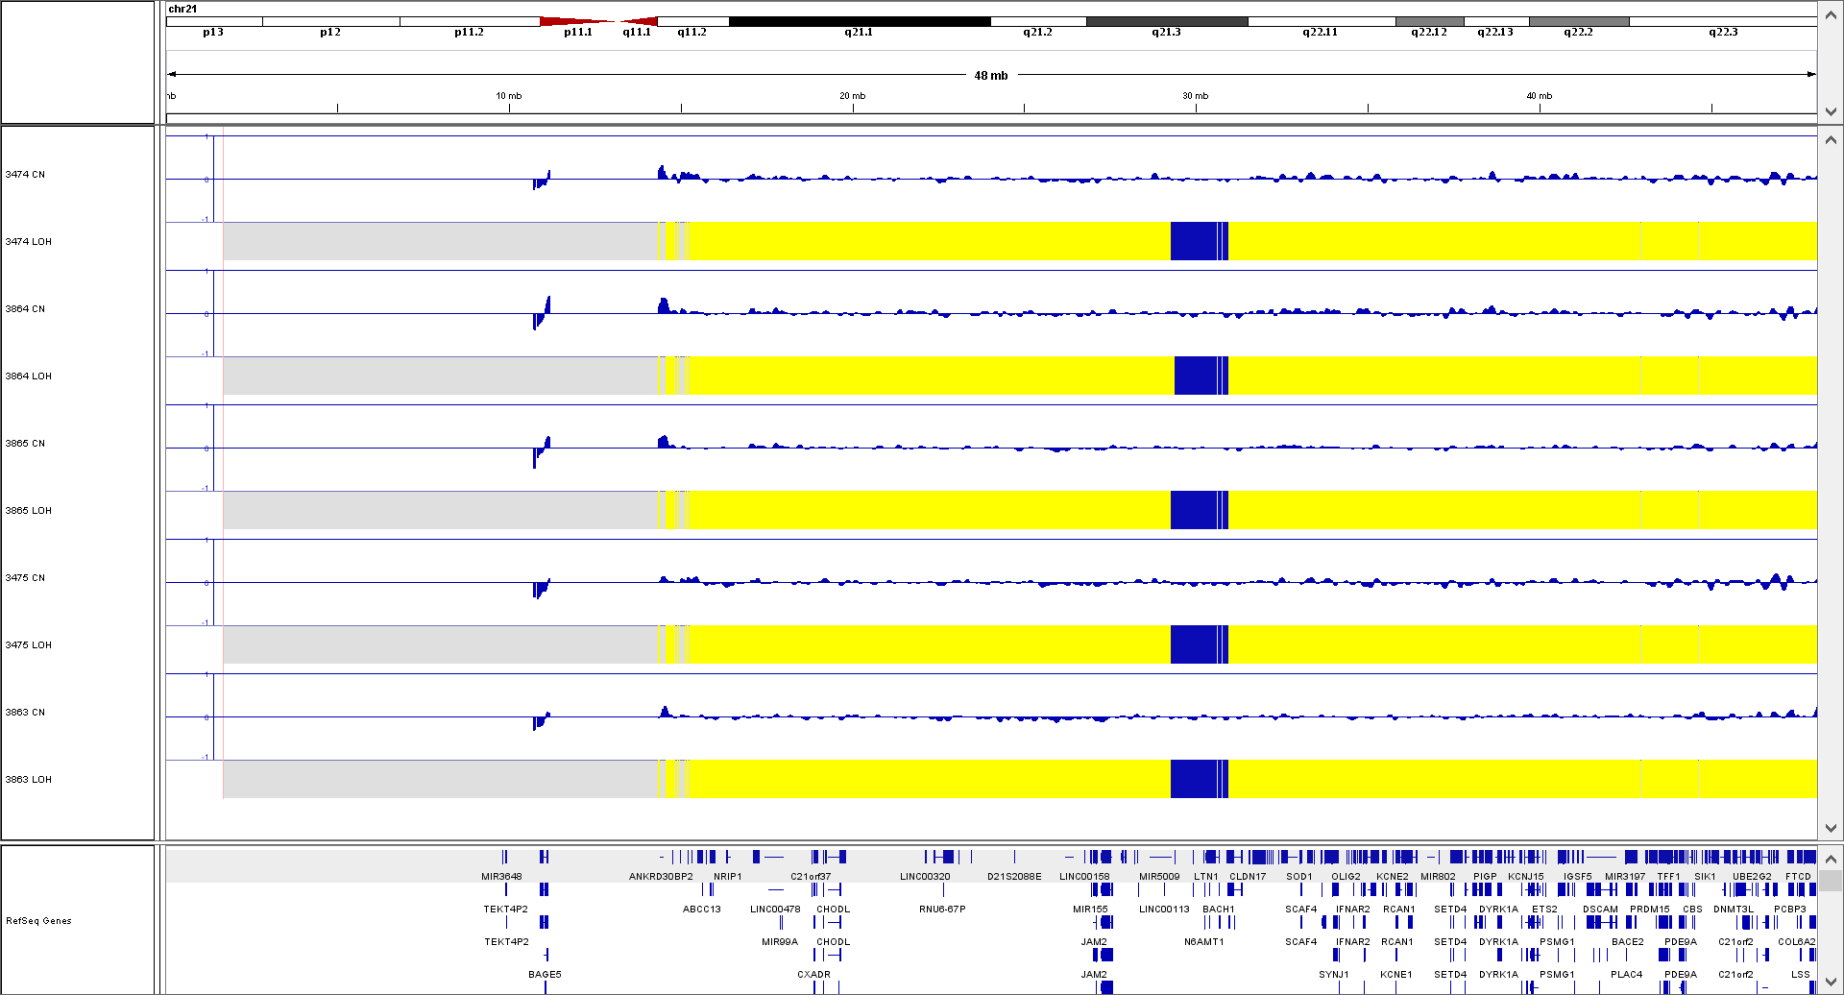

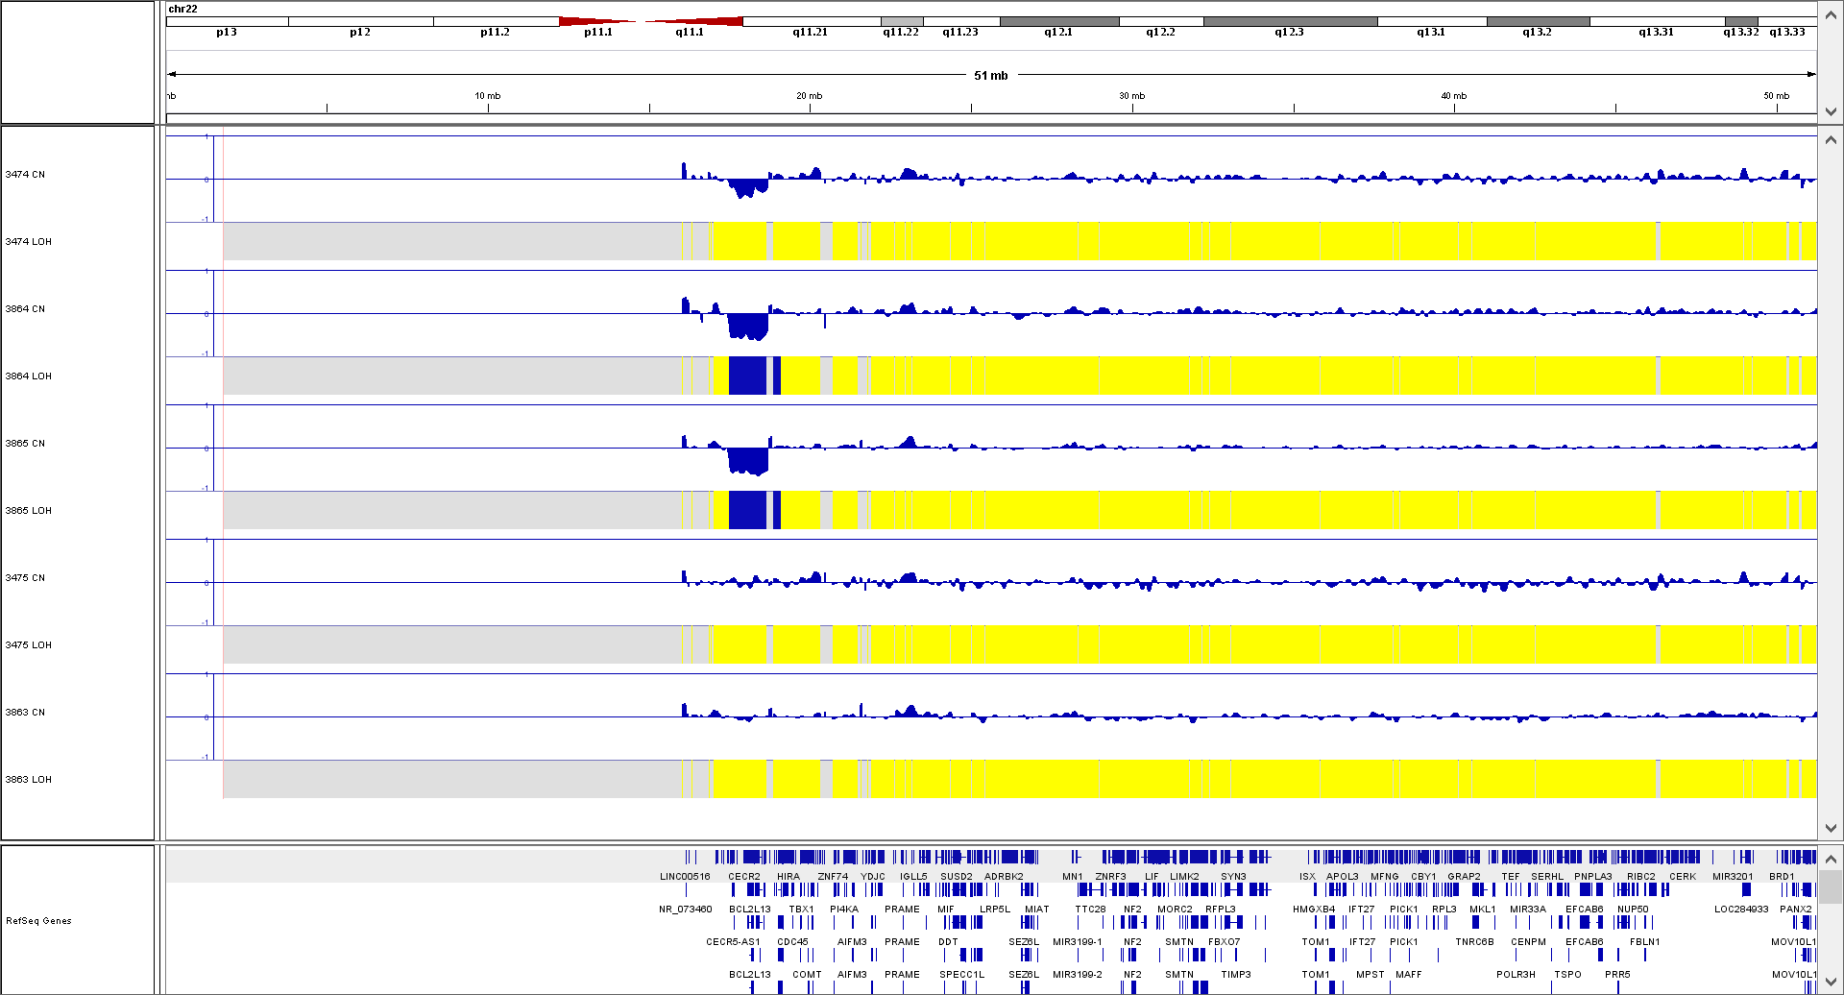

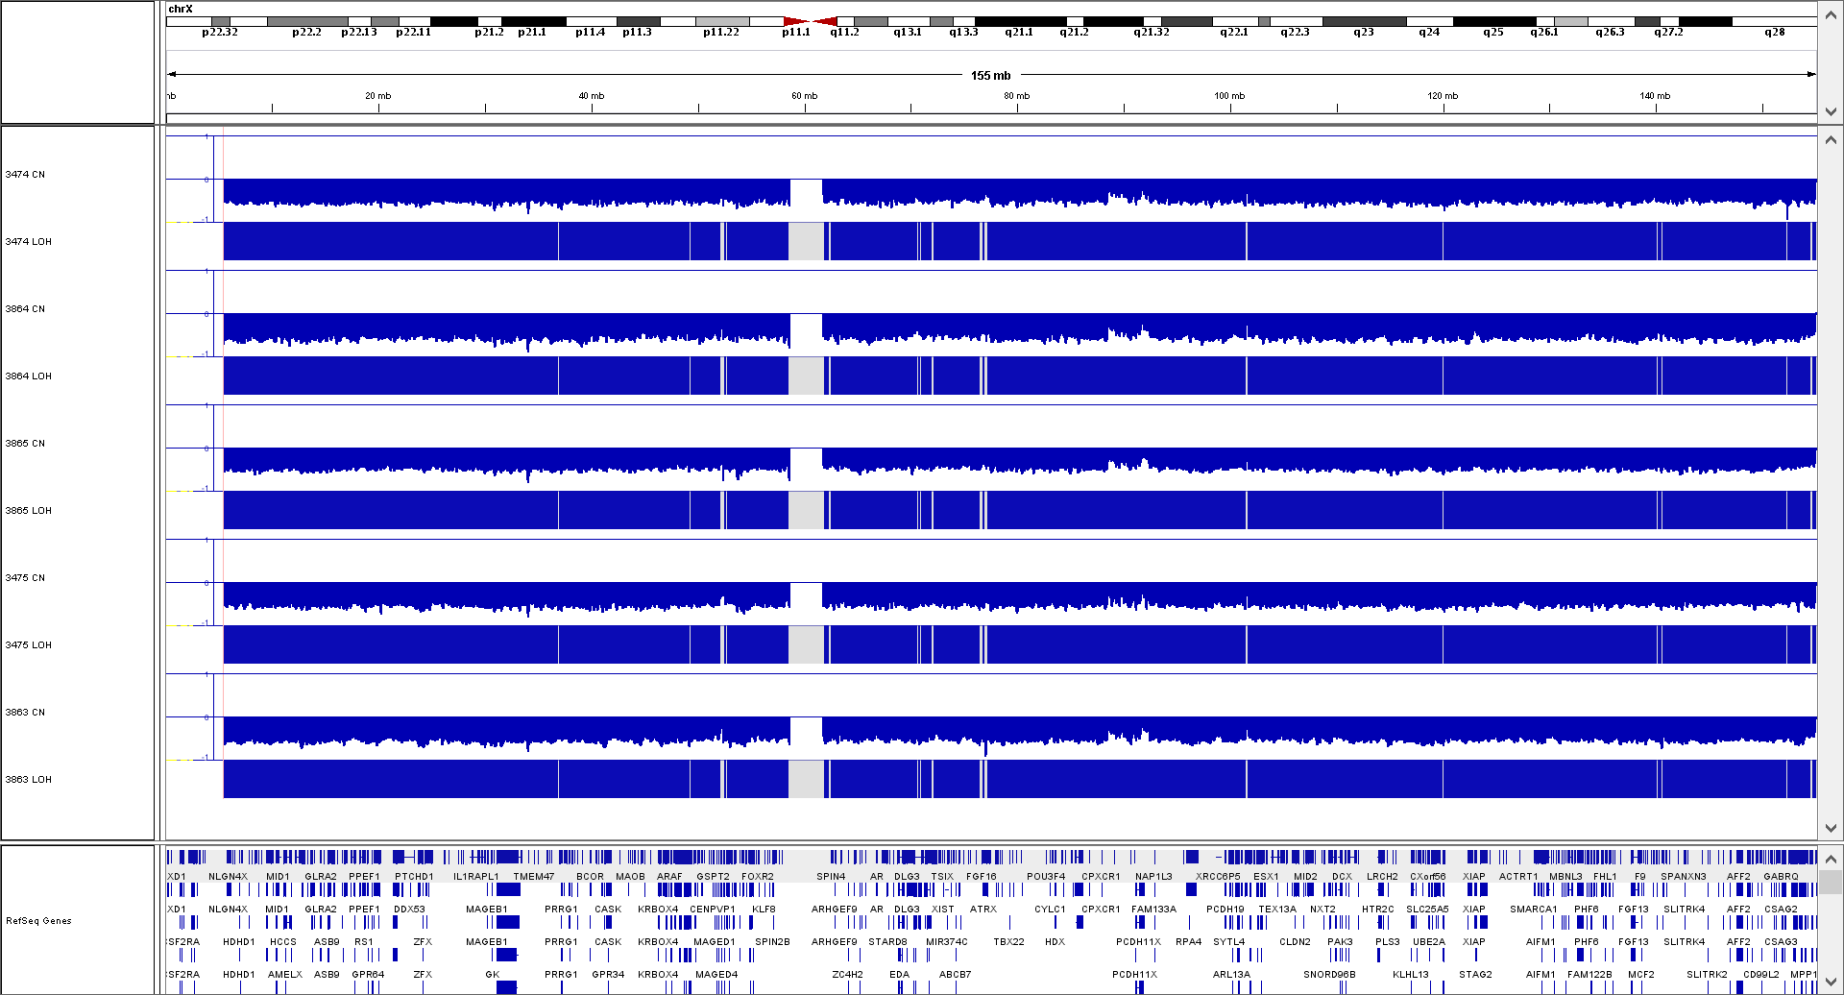

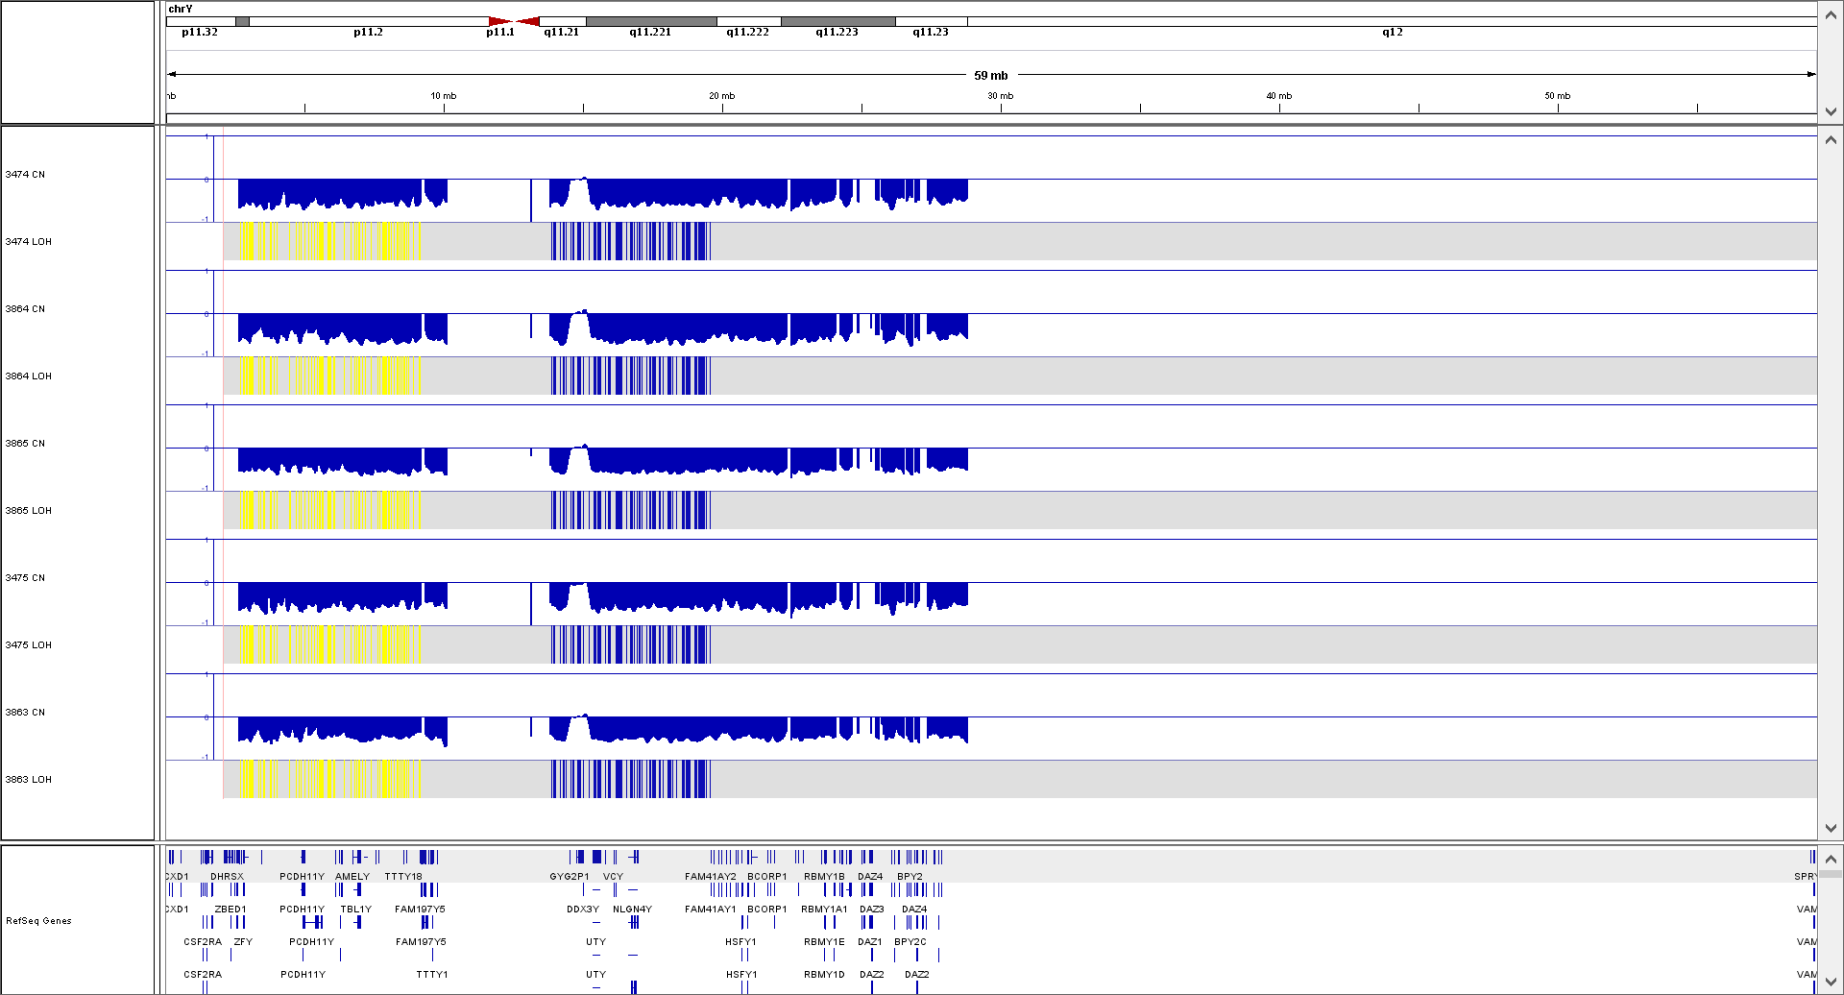

Supplement: oncotarget-06-7232-s001.pdf [file oncotarget-06-7232-s001.pdf]
